# Supplementary material for: Prevalence and correlates of psychological distress among 13–14 year old adolescent girls in North Karnataka, South India: a cross-sectional study
Source: Springer Nature journal article supplement (doi:10.1186/s12889-018-6355-z), 2019-01-10
Supplement: MOESM1 [file 16390354]

**EVALUATION OF AN INTERVENTION SUPPORTING ADOLESCENT GIRLS FROM MARGINALIZED COMMUNITIES TO STAY IN SCHOOL, REDUCE EARLY MARRIAGE, AND DELAY ENTRY INTO SEX WORK**

**Study with SC/ST Adolescent Girls  
KARNATAKA HEALTH PROMOTION TRUST, BANGALORE**

**SECTION I: INTERVIEW INFORMATION**

Study Number: \_\_\_\_\_

Name of the district: \_\_\_\_\_

Name of Taluk: \_\_\_\_\_

Name of City/Town/ Village \_\_\_\_\_

Date of interview:

DAY   MONTH   YEAR

Name and code of interviewer: \_\_\_\_\_

Consent Status: \_\_\_\_\_

- Parents/guardians given consent for the interview = 1
- Did not give consent for interview = 2
- Not available = 3

Completion Status: \_\_\_\_\_

- Completed interview = 1
- Partially completed interview = 2
- Not eligible = 3
- Refused = 4
- Not available = 5

**SECTION II: EDITING AND DATA ENTRY**

Name and code of Supervisor: \_\_\_\_\_

Date of scrutinizing the questionnaire:

DAY   MONTH   YEAR

Signature of Supervisor: \_\_\_\_\_

Name and code of Data entry person: \_\_\_\_\_

Date of data entry: DAY   MONTH   YEAR

Signature of data entry person: \_\_\_\_\_



**SECTION III: DEMOGRAPHIC CHARACTERISTICS**

**ASK THIS SECTION (I.E. UPTO QN.327) TO THE ADULT FAMILY MEMBER OF THE ADOLESCENT GIRL SELECTED FOR INTERVIEW FROM THE AY 2013-14 CLASS 7 ROSTER**

I'd like to begin by asking you about the people who usually live in your household, including those living here currently and those who may temporarily be away. I am especially interested in the parents and siblings of [name] the adolescent girl selected for interview, so I would like you to include them if they are alive, even if they do not live in your household.

| LINE NO. | USUAL RESIDENTS                                                                                                           | RELATIONS HIP TO THE AG SELECTED FOR INTERVIEW | SEX                      | RESIDENCE                      |                                  | AGE                | MARITAL STATUS                                | EDUCATION                  |                                                     |                                          | OCCUPATI ON                        | DEVADASI STATUS        | SEX WORKER STATUS       |
|----------|---------------------------------------------------------------------------------------------------------------------------|------------------------------------------------|--------------------------|--------------------------------|----------------------------------|--------------------|-----------------------------------------------|----------------------------|-----------------------------------------------------|------------------------------------------|------------------------------------|------------------------|-------------------------|
|          |                                                                                                                           |                                                |                          |                                |                                  |                    | (IF AGE 10 OR OLDER) 10                       | IF AGE 5 YEARS OR OLDER5   | IF AGE<25                                           | FOR FEMALE ONLY                          |                                    |                        |                         |
| (1)      | (2)                                                                                                                       | (3)                                            | (4)                      | (5)                            | (6)                              | (7)                | (8)                                           | (9)                        | (10)                                                | (11)                                     | (12)                               | (13)                   | (14)                    |
|          |                                                                                                                           | USE CODE                                       | M F                      | YES NO                         | YES NO                           | IN YEARS           | USE CODE                                      | YES NO                     | STANDARD                                            | YES NO                                   | USE CODE                           | YES NO                 | YES NO                  |
| 1        | Please give me the names of the persons who usually live in your household starting with the name of the respondents name | What is the relations hip of (name) to the AG? | Is (name) male or female | Does (name) usually live here? | Did (name) stay here last night? | How old is (name)? | What is the current marital status of (name)? | Can (name) read and write? | What is the highest standard (name) has completed ? | Is (Name) currentl y in School/ College? | What is the occupati on of (Name)? | Is (Name) a Devadasi ? | Is (Name) a Sex worker? |
|          |                                                                                                                           |                                                | 1 2                      | 1 0                            | 1 0                              |                    |                                               | 1 0                        |                                                     | 1 0                                      |                                    | 1 0                    | 1 0                     |
| 2        |                                                                                                                           |                                                | 1 2                      | 1 0                            | 1 0                              |                    |                                               | 1 0                        |                                                     | 1 0                                      |                                    | 1 0                    | 1 0                     |
| 3        |                                                                                                                           |                                                | 1 2                      | 1 0                            | 1 0                              |                    |                                               | 1 0                        |                                                     | 1 0                                      |                                    | 1 0                    | 1 0                     |
| 4        |                                                                                                                           |                                                | 1 2                      | 1 0                            | 1 0                              |                    |                                               | 1 0                        |                                                     | 1 0                                      |                                    | 1 0                    | 1 0                     |
| 5        |                                                                                                                           |                                                | 1 2                      | 1 0                            | 1 0                              |                    |                                               | 1 0                        |                                                     | 1 0                                      |                                    | 1 0                    | 1 0                     |
| 6        |                                                                                                                           |                                                | 1 2                      | 1 0                            | 1 0                              |                    |                                               | 1 0                        |                                                     | 1 0                                      |                                    | 1 0                    | 1 0                     |
| 7        |                                                                                                                           |                                                | 1 2                      | 1 0                            | 1 0                              |                    |                                               | 1 0                        |                                                     | 1 0                                      |                                    | 1 0                    | 1 0                     |
| 8        |                                                                                                                           |                                                | 1 2                      | 1 0                            | 1 0                              |                    |                                               | 1 0                        |                                                     | 1 0                                      |                                    | 1 0                    | 1 0                     |
| 9        |                                                                                                                           |                                                | 1 2                      | 1 0                            | 1 0                              |                    |                                               | 1 0                        |                                                     | 1 0                                      |                                    | 1 0                    | 1 0                     |
| 10       |                                                                                                                           |                                                | 1 2                      | 1 0                            | 1 0                              |                    |                                               | 1 0                        |                                                     | 1 0                                      |                                    | 1 0                    | 1 0                     |

| (1) | (2) | (3)                  | (4) | (5) | (6) | (7)                  | (8)                  | (9) | (10)                 | (11) | (12)                 | (13) | (14) |
|-----|-----|----------------------|-----|-----|-----|----------------------|----------------------|-----|----------------------|------|----------------------|------|------|
| 11  |     | <input type="text"/> | 1 2 | 1 0 | 1 0 | <input type="text"/> | <input type="text"/> | 1 0 | <input type="text"/> | 1 0  | <input type="text"/> | 1 0  | 1 0  |
| 12  |     | <input type="text"/> | 1 2 | 1 0 | 1 0 | <input type="text"/> | <input type="text"/> | 1 0 | <input type="text"/> | 1 0  | <input type="text"/> | 1 0  | 1 0  |
| 13  |     | <input type="text"/> | 1 2 | 1 0 | 1 0 | <input type="text"/> | <input type="text"/> | 1 0 | <input type="text"/> | 1 0  | <input type="text"/> | 1 0  | 1 0  |
| 14  |     | <input type="text"/> | 1 2 | 1 0 | 1 0 | <input type="text"/> | <input type="text"/> | 1 0 | <input type="text"/> | 1 0  | <input type="text"/> | 1 0  | 1 0  |

**A. CODES FOR COLUMN (3), RELATIONSHIP TO THE AG:** 01= ADOLESCENT GIRL 02=PARENT, 03=PARENT-IN-LAW, 04=BROTHER/SISTER, 05=BROTHER-IN-LAW/SISTER-IN-LAW 06=SPOUSE, 07=NIECE/NEPHEW, 08=SON/DAUGHTER, 09=GRAND PARENT, 10=OTHER RELATIVE, 11=NOT RELATED

**B.CODES FOR COLUMN (7) AGE:** AGE LESS THAN 1 YEAR=00, AGE 95 YEARS OR MORE=95, DON'T KNOW=98

**C.CODES FOR COLUMN (8), CURRENT MARITAL STATUS:** 01=CURRENTLY MARRIED, 02=MARRIED, BUT GAUNA NOT PEROFRMED,03=WIDOWED, 04=DIVORCED, 05=SEPERATED, 06=DESERTED, 07=NEVER MARRIED, 98=DON'T KNOW

**D.CODE FOR COLUMN (10), HIGHEST STADARD COMPLETED:** IF ILLITERATE, RECORD 0, OTHERWISE, RECORD HIGHEST GRADE COMPLETED

**10E.CODE FOR COLUMN (12) OCCUPATION:** 01=CULTIVATOR, 02=AGRICULTURAL LABOURER, 03=NON-AGRICULTURAL LABOURER, 04=BUSINESS, 05=SALARIED EMPLOYMENT, 06=HOUSEWORK, 07=STUDENT, 08=NOT WORKING/UNEMPLOYED, 09=SEX WORK, 10=OTHERS.

| NO. | QUESTIONS                                                                                                                                         | CODING CATEGORIES                                                                                                                                                                   | SKIP  |
|-----|---------------------------------------------------------------------------------------------------------------------------------------------------|-------------------------------------------------------------------------------------------------------------------------------------------------------------------------------------|-------|
| 315 | What is the name of the head of your household?<br><br>(CHECK THE NAME TOLD IN THE HOUSEHOLD LIST ABOVE AND REOCDR THE LINE NUMBER OF THE PERSON) | LINE NUMBER OF HOUSEHOLD HEAD ..... <input type="text"/> <input type="text"/>                                                                                                       |       |
| 316 | Does a member of this household own this house?                                                                                                   | YES ..... 1<br>NO ..... 0<br>DON'T KNOW ..... 98                                                                                                                                    |       |
| 317 | <b>OBSERVATION: INTERVIEWER: DO NOT ASK</b><br><br>IS THE HOME KUCCHA, SEMI-PUCCA OR PUCCA?                                                       | KUCCHA ..... 1<br>SEMI-PUCCA ..... 2<br>PUCCA ..... 3                                                                                                                               |       |
| 318 | Does this household own any agricultural land?                                                                                                    | YES ..... 1<br>NO ..... 0<br>DON'T KNOW ..... 98                                                                                                                                    | } 320 |
| 319 | How much agricultural land does this household own? _____<br><br>{size and unit}                                                                  | ACRES ..... <input type="text"/> <input type="text"/> <input type="text"/> .. <input type="text"/> <input type="text"/><br>DON'T KNOW ..... 9998                                    |       |
| 320 | How many rooms are there in your house including kitchen, but excluding toilets and bathrooms if any?                                             | NUMBER OF ROOMS ..... <input type="text"/> <input type="text"/>                                                                                                                     |       |
| 321 | What kind of toilet facility does your household have?                                                                                            | NO FACILITY ..... 0<br>OWN FLUSH TIOLET ..... 1<br>SHARED FLUSH TOILET ..... 2<br>OWN PIT TOILET ..... 3<br>SHARED PIT TOILET ..... 4<br>OTHER (SPECIFY) ..... 96                   |       |
| 322 | What is the <u>main</u> source of lighting for your household?                                                                                    | ELECTRICITY ..... 1<br>KEROSENE ..... 2<br>GAS ..... 3<br>OIL ..... 4<br>OTHERS (SPECIFY) ..... 96                                                                                  |       |
| 323 | What is the main type of fuel your household commonly uses for cooking?                                                                           | WOOD/CROP RESIDUE/ DUNG CAKES/ COAL CHARCOAL ... 1<br>KEROSENE ..... 2<br>ELECTRICITY ..... 3<br>LIQUID PETROLEUM GAS (LPG) ..... 4<br>BIO-GAS ..... 5<br>OTHERS (SPECIFY) ..... 96 |       |
| 324 | What is the <u>main</u> source of drinking water for the members of your household?                                                               | <u>OWN</u><br>PIPED WATER/HANDPUMP/COVERED WELL ..... 1<br>OPEN WELL ..... 2<br><br><u>PUBLIC</u>                                                                                   |       |

| NO.                         | QUESTIONS                                                                                                                             | CODING CATEGORIES                                                                                                                                                                                                                                                                                                                                                                                                                                                                                                                                                                                                                                                                                                                                                                                                                                                                                                                                                                                                                                                                                                                                                                                                                                                                                                                                                                                                                                                                                                                                                                                                                                                                                                                                                                                                                                                                                                                                                                                                                                                                                                                                                                                                                                                                                                                                   | SKIP                  |     |    |                      |   |   |                       |   |   |                  |   |   |                             |   |   |                  |   |   |                           |   |   |                         |   |   |                            |   |   |                           |   |   |                         |   |   |                          |   |   |                       |   |   |                      |   |   |                            |   |   |                    |   |   |                     |   |   |                  |   |   |                  |   |   |  |
|-----------------------------|---------------------------------------------------------------------------------------------------------------------------------------|-----------------------------------------------------------------------------------------------------------------------------------------------------------------------------------------------------------------------------------------------------------------------------------------------------------------------------------------------------------------------------------------------------------------------------------------------------------------------------------------------------------------------------------------------------------------------------------------------------------------------------------------------------------------------------------------------------------------------------------------------------------------------------------------------------------------------------------------------------------------------------------------------------------------------------------------------------------------------------------------------------------------------------------------------------------------------------------------------------------------------------------------------------------------------------------------------------------------------------------------------------------------------------------------------------------------------------------------------------------------------------------------------------------------------------------------------------------------------------------------------------------------------------------------------------------------------------------------------------------------------------------------------------------------------------------------------------------------------------------------------------------------------------------------------------------------------------------------------------------------------------------------------------------------------------------------------------------------------------------------------------------------------------------------------------------------------------------------------------------------------------------------------------------------------------------------------------------------------------------------------------------------------------------------------------------------------------------------------------|-----------------------|-----|----|----------------------|---|---|-----------------------|---|---|------------------|---|---|-----------------------------|---|---|------------------|---|---|---------------------------|---|---|-------------------------|---|---|----------------------------|---|---|---------------------------|---|---|-------------------------|---|---|--------------------------|---|---|-----------------------|---|---|----------------------|---|---|----------------------------|---|---|--------------------|---|---|---------------------|---|---|------------------|---|---|------------------|---|---|--|
|                             |                                                                                                                                       | PIPED WATER/HANDPUMP/COVERED WELL ..... 3<br>OPEN WELL ..... 4<br>SURFACE WATER (SPRING/RIVER/STREAM/POND/<br>LAKE/DAM ..... 5<br>RAINWATER ..... 6<br>TANKER TRUCK ..... 7<br>OTHER (SPECIFY) _____ ..... 96                                                                                                                                                                                                                                                                                                                                                                                                                                                                                                                                                                                                                                                                                                                                                                                                                                                                                                                                                                                                                                                                                                                                                                                                                                                                                                                                                                                                                                                                                                                                                                                                                                                                                                                                                                                                                                                                                                                                                                                                                                                                                                                                       |                       |     |    |                      |   |   |                       |   |   |                  |   |   |                             |   |   |                  |   |   |                           |   |   |                         |   |   |                            |   |   |                           |   |   |                         |   |   |                          |   |   |                       |   |   |                      |   |   |                            |   |   |                    |   |   |                     |   |   |                  |   |   |                  |   |   |  |
| 325                         | Does your household own any of the following assets?<br><br><b>(READ EACH ITEM AND RECORD RESPONSES FOR EACH)</b>                     | <table border="0"> <thead> <tr> <th></th> <th style="text-align: center;">YES</th> <th style="text-align: center;">NO</th> </tr> </thead> <tbody> <tr><td>A. ELECTRICITY .....</td><td style="text-align: center;">1</td><td style="text-align: center;">0</td></tr> <tr><td>B. ELECTRIC FAN .....</td><td style="text-align: center;">1</td><td style="text-align: center;">0</td></tr> <tr><td>C. BICYCLE .....</td><td style="text-align: center;">1</td><td style="text-align: center;">0</td></tr> <tr><td>D. MOTORCYCLE/SCOOTER .....</td><td style="text-align: center;">1</td><td style="text-align: center;">0</td></tr> <tr><td>E. COT/BED .....</td><td style="text-align: center;">1</td><td style="text-align: center;">0</td></tr> <tr><td>F. RADIO/TRANSISTOR .....</td><td style="text-align: center;">1</td><td style="text-align: center;">0</td></tr> <tr><td>G. B&amp;W TELEVISION .....</td><td style="text-align: center;">1</td><td style="text-align: center;">0</td></tr> <tr><td>H. COLOUR TELEVISION .....</td><td style="text-align: center;">1</td><td style="text-align: center;">0</td></tr> <tr><td>I. LAND LINE/MOBILE .....</td><td style="text-align: center;">1</td><td style="text-align: center;">0</td></tr> <tr><td>J. SEWING MACHINE .....</td><td style="text-align: center;">1</td><td style="text-align: center;">0</td></tr> <tr><td>K. COMPUTER/LAPTOP .....</td><td style="text-align: center;">1</td><td style="text-align: center;">0</td></tr> <tr><td>L. REFRIGERATOR .....</td><td style="text-align: center;">1</td><td style="text-align: center;">0</td></tr> <tr><td>M. WATCH/CLOCK .....</td><td style="text-align: center;">1</td><td style="text-align: center;">0</td></tr> <tr><td>N. ANIMAL DRAWN CART .....</td><td style="text-align: center;">1</td><td style="text-align: center;">0</td></tr> <tr><td>O. CAR/TRUCK .....</td><td style="text-align: center;">1</td><td style="text-align: center;">0</td></tr> <tr><td>P. WATER PUMP .....</td><td style="text-align: center;">1</td><td style="text-align: center;">0</td></tr> <tr><td>Q. TRESHER .....</td><td style="text-align: center;">1</td><td style="text-align: center;">0</td></tr> <tr><td>R. TRACTOR .....</td><td style="text-align: center;">1</td><td style="text-align: center;">0</td></tr> </tbody> </table> |                       | YES | NO | A. ELECTRICITY ..... | 1 | 0 | B. ELECTRIC FAN ..... | 1 | 0 | C. BICYCLE ..... | 1 | 0 | D. MOTORCYCLE/SCOOTER ..... | 1 | 0 | E. COT/BED ..... | 1 | 0 | F. RADIO/TRANSISTOR ..... | 1 | 0 | G. B&W TELEVISION ..... | 1 | 0 | H. COLOUR TELEVISION ..... | 1 | 0 | I. LAND LINE/MOBILE ..... | 1 | 0 | J. SEWING MACHINE ..... | 1 | 0 | K. COMPUTER/LAPTOP ..... | 1 | 0 | L. REFRIGERATOR ..... | 1 | 0 | M. WATCH/CLOCK ..... | 1 | 0 | N. ANIMAL DRAWN CART ..... | 1 | 0 | O. CAR/TRUCK ..... | 1 | 0 | P. WATER PUMP ..... | 1 | 0 | Q. TRESHER ..... | 1 | 0 | R. TRACTOR ..... | 1 | 0 |  |
|                             | YES                                                                                                                                   | NO                                                                                                                                                                                                                                                                                                                                                                                                                                                                                                                                                                                                                                                                                                                                                                                                                                                                                                                                                                                                                                                                                                                                                                                                                                                                                                                                                                                                                                                                                                                                                                                                                                                                                                                                                                                                                                                                                                                                                                                                                                                                                                                                                                                                                                                                                                                                                  |                       |     |    |                      |   |   |                       |   |   |                  |   |   |                             |   |   |                  |   |   |                           |   |   |                         |   |   |                            |   |   |                           |   |   |                         |   |   |                          |   |   |                       |   |   |                      |   |   |                            |   |   |                    |   |   |                     |   |   |                  |   |   |                  |   |   |  |
| A. ELECTRICITY .....        | 1                                                                                                                                     | 0                                                                                                                                                                                                                                                                                                                                                                                                                                                                                                                                                                                                                                                                                                                                                                                                                                                                                                                                                                                                                                                                                                                                                                                                                                                                                                                                                                                                                                                                                                                                                                                                                                                                                                                                                                                                                                                                                                                                                                                                                                                                                                                                                                                                                                                                                                                                                   |                       |     |    |                      |   |   |                       |   |   |                  |   |   |                             |   |   |                  |   |   |                           |   |   |                         |   |   |                            |   |   |                           |   |   |                         |   |   |                          |   |   |                       |   |   |                      |   |   |                            |   |   |                    |   |   |                     |   |   |                  |   |   |                  |   |   |  |
| B. ELECTRIC FAN .....       | 1                                                                                                                                     | 0                                                                                                                                                                                                                                                                                                                                                                                                                                                                                                                                                                                                                                                                                                                                                                                                                                                                                                                                                                                                                                                                                                                                                                                                                                                                                                                                                                                                                                                                                                                                                                                                                                                                                                                                                                                                                                                                                                                                                                                                                                                                                                                                                                                                                                                                                                                                                   |                       |     |    |                      |   |   |                       |   |   |                  |   |   |                             |   |   |                  |   |   |                           |   |   |                         |   |   |                            |   |   |                           |   |   |                         |   |   |                          |   |   |                       |   |   |                      |   |   |                            |   |   |                    |   |   |                     |   |   |                  |   |   |                  |   |   |  |
| C. BICYCLE .....            | 1                                                                                                                                     | 0                                                                                                                                                                                                                                                                                                                                                                                                                                                                                                                                                                                                                                                                                                                                                                                                                                                                                                                                                                                                                                                                                                                                                                                                                                                                                                                                                                                                                                                                                                                                                                                                                                                                                                                                                                                                                                                                                                                                                                                                                                                                                                                                                                                                                                                                                                                                                   |                       |     |    |                      |   |   |                       |   |   |                  |   |   |                             |   |   |                  |   |   |                           |   |   |                         |   |   |                            |   |   |                           |   |   |                         |   |   |                          |   |   |                       |   |   |                      |   |   |                            |   |   |                    |   |   |                     |   |   |                  |   |   |                  |   |   |  |
| D. MOTORCYCLE/SCOOTER ..... | 1                                                                                                                                     | 0                                                                                                                                                                                                                                                                                                                                                                                                                                                                                                                                                                                                                                                                                                                                                                                                                                                                                                                                                                                                                                                                                                                                                                                                                                                                                                                                                                                                                                                                                                                                                                                                                                                                                                                                                                                                                                                                                                                                                                                                                                                                                                                                                                                                                                                                                                                                                   |                       |     |    |                      |   |   |                       |   |   |                  |   |   |                             |   |   |                  |   |   |                           |   |   |                         |   |   |                            |   |   |                           |   |   |                         |   |   |                          |   |   |                       |   |   |                      |   |   |                            |   |   |                    |   |   |                     |   |   |                  |   |   |                  |   |   |  |
| E. COT/BED .....            | 1                                                                                                                                     | 0                                                                                                                                                                                                                                                                                                                                                                                                                                                                                                                                                                                                                                                                                                                                                                                                                                                                                                                                                                                                                                                                                                                                                                                                                                                                                                                                                                                                                                                                                                                                                                                                                                                                                                                                                                                                                                                                                                                                                                                                                                                                                                                                                                                                                                                                                                                                                   |                       |     |    |                      |   |   |                       |   |   |                  |   |   |                             |   |   |                  |   |   |                           |   |   |                         |   |   |                            |   |   |                           |   |   |                         |   |   |                          |   |   |                       |   |   |                      |   |   |                            |   |   |                    |   |   |                     |   |   |                  |   |   |                  |   |   |  |
| F. RADIO/TRANSISTOR .....   | 1                                                                                                                                     | 0                                                                                                                                                                                                                                                                                                                                                                                                                                                                                                                                                                                                                                                                                                                                                                                                                                                                                                                                                                                                                                                                                                                                                                                                                                                                                                                                                                                                                                                                                                                                                                                                                                                                                                                                                                                                                                                                                                                                                                                                                                                                                                                                                                                                                                                                                                                                                   |                       |     |    |                      |   |   |                       |   |   |                  |   |   |                             |   |   |                  |   |   |                           |   |   |                         |   |   |                            |   |   |                           |   |   |                         |   |   |                          |   |   |                       |   |   |                      |   |   |                            |   |   |                    |   |   |                     |   |   |                  |   |   |                  |   |   |  |
| G. B&W TELEVISION .....     | 1                                                                                                                                     | 0                                                                                                                                                                                                                                                                                                                                                                                                                                                                                                                                                                                                                                                                                                                                                                                                                                                                                                                                                                                                                                                                                                                                                                                                                                                                                                                                                                                                                                                                                                                                                                                                                                                                                                                                                                                                                                                                                                                                                                                                                                                                                                                                                                                                                                                                                                                                                   |                       |     |    |                      |   |   |                       |   |   |                  |   |   |                             |   |   |                  |   |   |                           |   |   |                         |   |   |                            |   |   |                           |   |   |                         |   |   |                          |   |   |                       |   |   |                      |   |   |                            |   |   |                    |   |   |                     |   |   |                  |   |   |                  |   |   |  |
| H. COLOUR TELEVISION .....  | 1                                                                                                                                     | 0                                                                                                                                                                                                                                                                                                                                                                                                                                                                                                                                                                                                                                                                                                                                                                                                                                                                                                                                                                                                                                                                                                                                                                                                                                                                                                                                                                                                                                                                                                                                                                                                                                                                                                                                                                                                                                                                                                                                                                                                                                                                                                                                                                                                                                                                                                                                                   |                       |     |    |                      |   |   |                       |   |   |                  |   |   |                             |   |   |                  |   |   |                           |   |   |                         |   |   |                            |   |   |                           |   |   |                         |   |   |                          |   |   |                       |   |   |                      |   |   |                            |   |   |                    |   |   |                     |   |   |                  |   |   |                  |   |   |  |
| I. LAND LINE/MOBILE .....   | 1                                                                                                                                     | 0                                                                                                                                                                                                                                                                                                                                                                                                                                                                                                                                                                                                                                                                                                                                                                                                                                                                                                                                                                                                                                                                                                                                                                                                                                                                                                                                                                                                                                                                                                                                                                                                                                                                                                                                                                                                                                                                                                                                                                                                                                                                                                                                                                                                                                                                                                                                                   |                       |     |    |                      |   |   |                       |   |   |                  |   |   |                             |   |   |                  |   |   |                           |   |   |                         |   |   |                            |   |   |                           |   |   |                         |   |   |                          |   |   |                       |   |   |                      |   |   |                            |   |   |                    |   |   |                     |   |   |                  |   |   |                  |   |   |  |
| J. SEWING MACHINE .....     | 1                                                                                                                                     | 0                                                                                                                                                                                                                                                                                                                                                                                                                                                                                                                                                                                                                                                                                                                                                                                                                                                                                                                                                                                                                                                                                                                                                                                                                                                                                                                                                                                                                                                                                                                                                                                                                                                                                                                                                                                                                                                                                                                                                                                                                                                                                                                                                                                                                                                                                                                                                   |                       |     |    |                      |   |   |                       |   |   |                  |   |   |                             |   |   |                  |   |   |                           |   |   |                         |   |   |                            |   |   |                           |   |   |                         |   |   |                          |   |   |                       |   |   |                      |   |   |                            |   |   |                    |   |   |                     |   |   |                  |   |   |                  |   |   |  |
| K. COMPUTER/LAPTOP .....    | 1                                                                                                                                     | 0                                                                                                                                                                                                                                                                                                                                                                                                                                                                                                                                                                                                                                                                                                                                                                                                                                                                                                                                                                                                                                                                                                                                                                                                                                                                                                                                                                                                                                                                                                                                                                                                                                                                                                                                                                                                                                                                                                                                                                                                                                                                                                                                                                                                                                                                                                                                                   |                       |     |    |                      |   |   |                       |   |   |                  |   |   |                             |   |   |                  |   |   |                           |   |   |                         |   |   |                            |   |   |                           |   |   |                         |   |   |                          |   |   |                       |   |   |                      |   |   |                            |   |   |                    |   |   |                     |   |   |                  |   |   |                  |   |   |  |
| L. REFRIGERATOR .....       | 1                                                                                                                                     | 0                                                                                                                                                                                                                                                                                                                                                                                                                                                                                                                                                                                                                                                                                                                                                                                                                                                                                                                                                                                                                                                                                                                                                                                                                                                                                                                                                                                                                                                                                                                                                                                                                                                                                                                                                                                                                                                                                                                                                                                                                                                                                                                                                                                                                                                                                                                                                   |                       |     |    |                      |   |   |                       |   |   |                  |   |   |                             |   |   |                  |   |   |                           |   |   |                         |   |   |                            |   |   |                           |   |   |                         |   |   |                          |   |   |                       |   |   |                      |   |   |                            |   |   |                    |   |   |                     |   |   |                  |   |   |                  |   |   |  |
| M. WATCH/CLOCK .....        | 1                                                                                                                                     | 0                                                                                                                                                                                                                                                                                                                                                                                                                                                                                                                                                                                                                                                                                                                                                                                                                                                                                                                                                                                                                                                                                                                                                                                                                                                                                                                                                                                                                                                                                                                                                                                                                                                                                                                                                                                                                                                                                                                                                                                                                                                                                                                                                                                                                                                                                                                                                   |                       |     |    |                      |   |   |                       |   |   |                  |   |   |                             |   |   |                  |   |   |                           |   |   |                         |   |   |                            |   |   |                           |   |   |                         |   |   |                          |   |   |                       |   |   |                      |   |   |                            |   |   |                    |   |   |                     |   |   |                  |   |   |                  |   |   |  |
| N. ANIMAL DRAWN CART .....  | 1                                                                                                                                     | 0                                                                                                                                                                                                                                                                                                                                                                                                                                                                                                                                                                                                                                                                                                                                                                                                                                                                                                                                                                                                                                                                                                                                                                                                                                                                                                                                                                                                                                                                                                                                                                                                                                                                                                                                                                                                                                                                                                                                                                                                                                                                                                                                                                                                                                                                                                                                                   |                       |     |    |                      |   |   |                       |   |   |                  |   |   |                             |   |   |                  |   |   |                           |   |   |                         |   |   |                            |   |   |                           |   |   |                         |   |   |                          |   |   |                       |   |   |                      |   |   |                            |   |   |                    |   |   |                     |   |   |                  |   |   |                  |   |   |  |
| O. CAR/TRUCK .....          | 1                                                                                                                                     | 0                                                                                                                                                                                                                                                                                                                                                                                                                                                                                                                                                                                                                                                                                                                                                                                                                                                                                                                                                                                                                                                                                                                                                                                                                                                                                                                                                                                                                                                                                                                                                                                                                                                                                                                                                                                                                                                                                                                                                                                                                                                                                                                                                                                                                                                                                                                                                   |                       |     |    |                      |   |   |                       |   |   |                  |   |   |                             |   |   |                  |   |   |                           |   |   |                         |   |   |                            |   |   |                           |   |   |                         |   |   |                          |   |   |                       |   |   |                      |   |   |                            |   |   |                    |   |   |                     |   |   |                  |   |   |                  |   |   |  |
| P. WATER PUMP .....         | 1                                                                                                                                     | 0                                                                                                                                                                                                                                                                                                                                                                                                                                                                                                                                                                                                                                                                                                                                                                                                                                                                                                                                                                                                                                                                                                                                                                                                                                                                                                                                                                                                                                                                                                                                                                                                                                                                                                                                                                                                                                                                                                                                                                                                                                                                                                                                                                                                                                                                                                                                                   |                       |     |    |                      |   |   |                       |   |   |                  |   |   |                             |   |   |                  |   |   |                           |   |   |                         |   |   |                            |   |   |                           |   |   |                         |   |   |                          |   |   |                       |   |   |                      |   |   |                            |   |   |                    |   |   |                     |   |   |                  |   |   |                  |   |   |  |
| Q. TRESHER .....            | 1                                                                                                                                     | 0                                                                                                                                                                                                                                                                                                                                                                                                                                                                                                                                                                                                                                                                                                                                                                                                                                                                                                                                                                                                                                                                                                                                                                                                                                                                                                                                                                                                                                                                                                                                                                                                                                                                                                                                                                                                                                                                                                                                                                                                                                                                                                                                                                                                                                                                                                                                                   |                       |     |    |                      |   |   |                       |   |   |                  |   |   |                             |   |   |                  |   |   |                           |   |   |                         |   |   |                            |   |   |                           |   |   |                         |   |   |                          |   |   |                       |   |   |                      |   |   |                            |   |   |                    |   |   |                     |   |   |                  |   |   |                  |   |   |  |
| R. TRACTOR .....            | 1                                                                                                                                     | 0                                                                                                                                                                                                                                                                                                                                                                                                                                                                                                                                                                                                                                                                                                                                                                                                                                                                                                                                                                                                                                                                                                                                                                                                                                                                                                                                                                                                                                                                                                                                                                                                                                                                                                                                                                                                                                                                                                                                                                                                                                                                                                                                                                                                                                                                                                                                                   |                       |     |    |                      |   |   |                       |   |   |                  |   |   |                             |   |   |                  |   |   |                           |   |   |                         |   |   |                            |   |   |                           |   |   |                         |   |   |                          |   |   |                       |   |   |                      |   |   |                            |   |   |                    |   |   |                     |   |   |                  |   |   |                  |   |   |  |
| 326                         | What is average monthly income of your household from all the sources?                                                                | RUPEES ..... <input type="text"/> <input type="text"/> <input type="text"/> <input type="text"/> <input type="text"/><br>DON'T KNOW ..... 98<br>NO ANSWER/. ..... 99                                                                                                                                                                                                                                                                                                                                                                                                                                                                                                                                                                                                                                                                                                                                                                                                                                                                                                                                                                                                                                                                                                                                                                                                                                                                                                                                                                                                                                                                                                                                                                                                                                                                                                                                                                                                                                                                                                                                                                                                                                                                                                                                                                                |                       |     |    |                      |   |   |                       |   |   |                  |   |   |                             |   |   |                  |   |   |                           |   |   |                         |   |   |                            |   |   |                           |   |   |                         |   |   |                          |   |   |                       |   |   |                      |   |   |                            |   |   |                    |   |   |                     |   |   |                  |   |   |                  |   |   |  |
| 327                         | In the past 4 weeks, how often did you or any member of your household go to sleep at night hungry because there was not enough food? | NEVER ..... 1<br>RARELY OR SOMETIMES (1-5 TIMES) ..... 2<br>OFTEN (MORE THAN 5 TIMES) ..... 3                                                                                                                                                                                                                                                                                                                                                                                                                                                                                                                                                                                                                                                                                                                                                                                                                                                                                                                                                                                                                                                                                                                                                                                                                                                                                                                                                                                                                                                                                                                                                                                                                                                                                                                                                                                                                                                                                                                                                                                                                                                                                                                                                                                                                                                       |                       |     |    |                      |   |   |                       |   |   |                  |   |   |                             |   |   |                  |   |   |                           |   |   |                         |   |   |                            |   |   |                           |   |   |                         |   |   |                          |   |   |                       |   |   |                      |   |   |                            |   |   |                    |   |   |                     |   |   |                  |   |   |                  |   |   |  |
| 328                         | What is your caste or tribe?                                                                                                          | SCHEDULED CASTE..... 1<br>SCHEDULED TRIBE ..... 2<br>OTHER BACKWARD CLASS ..... 3<br>ANY OTHER (SPECIFY) ..... 96<br>DON'T KNOW ..... 98                                                                                                                                                                                                                                                                                                                                                                                                                                                                                                                                                                                                                                                                                                                                                                                                                                                                                                                                                                                                                                                                                                                                                                                                                                                                                                                                                                                                                                                                                                                                                                                                                                                                                                                                                                                                                                                                                                                                                                                                                                                                                                                                                                                                            | <b>END INTER-VIEW</b> |     |    |                      |   |   |                       |   |   |                  |   |   |                             |   |   |                  |   |   |                           |   |   |                         |   |   |                            |   |   |                           |   |   |                         |   |   |                          |   |   |                       |   |   |                      |   |   |                            |   |   |                    |   |   |                     |   |   |                  |   |   |                  |   |   |  |
| <b>FAMILY MIGRATION</b>     |                                                                                                                                       |                                                                                                                                                                                                                                                                                                                                                                                                                                                                                                                                                                                                                                                                                                                                                                                                                                                                                                                                                                                                                                                                                                                                                                                                                                                                                                                                                                                                                                                                                                                                                                                                                                                                                                                                                                                                                                                                                                                                                                                                                                                                                                                                                                                                                                                                                                                                                     |                       |     |    |                      |   |   |                       |   |   |                  |   |   |                             |   |   |                  |   |   |                           |   |   |                         |   |   |                            |   |   |                           |   |   |                         |   |   |                          |   |   |                       |   |   |                      |   |   |                            |   |   |                    |   |   |                     |   |   |                  |   |   |                  |   |   |  |
| 328a                        | Did the family (parents) of [AG name] ever migrate outside the district for work in the past 12 months?                               | YES ..... 1<br>NO ..... 0<br>DON'T KNOW ..... 98<br>NO ANSWER ..... 99                                                                                                                                                                                                                                                                                                                                                                                                                                                                                                                                                                                                                                                                                                                                                                                                                                                                                                                                                                                                                                                                                                                                                                                                                                                                                                                                                                                                                                                                                                                                                                                                                                                                                                                                                                                                                                                                                                                                                                                                                                                                                                                                                                                                                                                                              | <b>329</b>            |     |    |                      |   |   |                       |   |   |                  |   |   |                             |   |   |                  |   |   |                           |   |   |                         |   |   |                            |   |   |                           |   |   |                         |   |   |                          |   |   |                       |   |   |                      |   |   |                            |   |   |                    |   |   |                     |   |   |                  |   |   |                  |   |   |  |

| NO.  | QUESTIONS                                                                           | CODING CATEGORIES                   | SKIP |
|------|-------------------------------------------------------------------------------------|-------------------------------------|------|
| 328b | Which district and state did the family of [AG name] migrate in the past 12 months? | A. DISTRICT _____<br>B. STATE _____ |      |

**ASK THE FOLLOWING QUESTIONS (QN. 329 ONWARDS) TO THE ADOLESCENT GIRL SELECTED FOR INTERVIEW IN COMPLETE PRIVACY**

| NO. | QUESTIONS                                                                                                                    | CODING CATEGORIES                                                                                                                                                                                                       | SKIP |
|-----|------------------------------------------------------------------------------------------------------------------------------|-------------------------------------------------------------------------------------------------------------------------------------------------------------------------------------------------------------------------|------|
|     | <b>I'd like to begin our interview by asking some basic questions about your current life situation.</b>                     |                                                                                                                                                                                                                         |      |
| 329 | Where do you currently live?                                                                                                 | AT HOME WITH ONE OR MORE OF YOUR BIRTH PARENTS ..... 1<br>WITH THE FAMILY OF YOUR HUSBAND OR HUSBAND TO BE ..... 2<br>IN THE HOME OF ANOTHER FAMILY MEMBER ..... 3<br>ELSEWHERE [NOTE WHERE] ..... 4                    |      |
| 330 | What is your current marital status?                                                                                         | CURRENTLY MARRIED ..... 1<br>MARRIED BUT GAUNA NOT PERFORMED ..... 2<br>DESERTED/SEPARATED/DIVORCED ..... 3<br>WIDOWED ..... 4<br>ENGAGED ..... 5<br>NEVER MARRIED ..... 6<br>DON'T KNOW ..... 98<br>NO ANSWER ..... 99 |      |
| 331 | Are you a Devadasi?                                                                                                          | YES ..... 1<br>NO ..... 0<br>DON'T KNOW ..... 98<br>NO ANSWER ..... 99                                                                                                                                                  |      |
| 332 | CHECK Q 330:CODE '1','2','3','4' <input type="checkbox"/> CIRCLED<br>CODE '5','6','98','99' <input type="checkbox"/> CIRCLED |                                                                                                                                                                                                                         | 335  |
| 333 | How old were you at the time of your marriage?                                                                               | AGE IN COMPLETED YEARS ..... <input type="text"/> <input type="text"/><br>DON'T KNOW ..... 98                                                                                                                           |      |
| 334 | How old were you when you started living with your husband?                                                                  | AGE IN COMPLETED YEARS ..... <input type="text"/> <input type="text"/><br>HAVEN'T STARTED LIVING WITH HUSBAND ..... 95<br>DON'T KNOW ..... 98                                                                           |      |

| Q335 Now I would like to ask some details of your siblings. Can you please give me the details of your siblings starting with the eldest sibling? |          |     |                      |                          |                      |                                           |                                              |                                             |                                                |                                    |      |
|---------------------------------------------------------------------------------------------------------------------------------------------------|----------|-----|----------------------|--------------------------|----------------------|-------------------------------------------|----------------------------------------------|---------------------------------------------|------------------------------------------------|------------------------------------|------|
| LINE NO.                                                                                                                                          | Siblings | SEX | AGE                  | EDUCATION                |                      | MARITAL STATUS<br>(IF AGE 10 OR OLDER) 10 | RESIDENCE                                    |                                             |                                                | Remark<br>(Record survival status) |      |
|                                                                                                                                                   |          |     |                      | IF AGE 5 YEARS OR OLDER5 | IF AGE<25            |                                           | Does (name) currently live with your family? | If 'no' which state they are living in now? | If 'no' which district they are living in now? |                                    |      |
| (1)                                                                                                                                               | (2)      | (3) | (4)                  | (5)                      | (6)                  | (7)                                       | (8)                                          | (9)                                         | (10)                                           | (11)                               | (12) |
|                                                                                                                                                   | Name     | M F | IN YEARS             | YES NO                   | IN YEARS             | YES NO                                    | USE CODE                                     | YES NO                                      | STATE NAME                                     | DISTRICT NAME                      |      |
| 1                                                                                                                                                 |          | 1 2 | <input type="text"/> | 1 0                      | <input type="text"/> | 1 0                                       | <input type="text"/>                         | 1 0                                         |                                                |                                    |      |
| 2                                                                                                                                                 |          | 1 2 | <input type="text"/> | 1 0                      | <input type="text"/> | 1 0                                       | <input type="text"/>                         | 1 0                                         |                                                |                                    |      |
| 3                                                                                                                                                 |          | 1 2 | <input type="text"/> | 1 0                      | <input type="text"/> | 1 0                                       | <input type="text"/>                         | 1 0                                         |                                                |                                    |      |
| 4                                                                                                                                                 |          | 1 2 | <input type="text"/> | 1 0                      | <input type="text"/> | 1 0                                       | <input type="text"/>                         | 1 0                                         |                                                |                                    |      |
| 5                                                                                                                                                 |          | 1 2 | <input type="text"/> | 1 0                      | <input type="text"/> | 1 0                                       | <input type="text"/>                         | 1 0                                         |                                                |                                    |      |
| 6                                                                                                                                                 |          | 1 2 | <input type="text"/> | 1 0                      | <input type="text"/> | 1 0                                       | <input type="text"/>                         | 1 0                                         |                                                |                                    |      |

A.CODES FOR COLUMN (4) AGE: AGE LESS THAN 1 YEAR=00, DON'T KNOW=98

B.CODES FOR COLUMN (6) HIGHEST STADARD COMPLETED: IF ILLITERATE, RECORD 0, OTHERWISE, RECORD HIGHEST GRADE COMPLETED

C.CODES FOR COLUMN (8), CURRENT MARITAL STATUS: 01=CURRENTLY MARRIED, 02=MARRIED, BUT GAUNA NOT PEROFRMED, 03=WIDOWED, 04=DIVORCED, 05=SEPERATED, 06=DESERTED, 07=NEVER MARRIED, 98=DON'T KNOW



| <p align="center"><b>BLOCK IV: ENTRY INTO SECONDARY SCHOOL AND QUALITY EDUCATION</b></p> <p>Now I'd like to ask you a few questions about your school and your schooling experience.</p> |                                                                                                                                                                   |                                                                                                                                                                                                                                                                                                                                                                                                                                                         |       |
|------------------------------------------------------------------------------------------------------------------------------------------------------------------------------------------|-------------------------------------------------------------------------------------------------------------------------------------------------------------------|---------------------------------------------------------------------------------------------------------------------------------------------------------------------------------------------------------------------------------------------------------------------------------------------------------------------------------------------------------------------------------------------------------------------------------------------------------|-------|
| NO.                                                                                                                                                                                      | QUESTIONS                                                                                                                                                         | CODING CATEGORIES                                                                                                                                                                                                                                                                                                                                                                                                                                       | SKIP  |
| 401                                                                                                                                                                                      | What was the last standard you completed?                                                                                                                         | STANDARD ..... <input type="text"/> <input type="text"/>                                                                                                                                                                                                                                                                                                                                                                                                |       |
| 402                                                                                                                                                                                      | Was the last school located in the same village where you live?<br>If "No" can you please tell me the name of village and taluk where you attended last standard? | YES ..... 1<br>NO ..... 0<br><b>IF NO, THEN</b><br>VILLAGE NAME _____<br>TALUK NAME _____                                                                                                                                                                                                                                                                                                                                                               |       |
| 403                                                                                                                                                                                      | Are you still attending school?                                                                                                                                   | YES ..... 1<br>NO ..... 0                                                                                                                                                                                                                                                                                                                                                                                                                               | → 405 |
| 404                                                                                                                                                                                      | In which standard are you currently studying?                                                                                                                     | STANDARD ..... <input type="text"/> <input type="text"/>                                                                                                                                                                                                                                                                                                                                                                                                |       |
| <b>SCHOOL ABSENTEEISM</b>                                                                                                                                                                |                                                                                                                                                                   |                                                                                                                                                                                                                                                                                                                                                                                                                                                         |       |
| 404a                                                                                                                                                                                     | Thinking about the last month you went to school, how many days in that month would you say that you didn't attend classes?                                       | NUMBER OF DAYS DID NOT ATTEND CLASS . <input type="text"/> <input type="text"/><br>DIDN'T MISS ANY CLASS IN THE LAST MONTH . 95                                                                                                                                                                                                                                                                                                                         | → 407 |
| 404b                                                                                                                                                                                     | Thinking about the last week you went to school, how many days would you say that you didn't attend?                                                              | NUMBER OF DAYS DID NOT ATTEND CLASS . <input type="text"/> <input type="text"/><br>DIDN'T MISS ANY CLASS IN THE LAST WEEK .. 95                                                                                                                                                                                                                                                                                                                         |       |
| 404c                                                                                                                                                                                     | What are the different reasons for not attending the school on some days in the last month?<br><br>(DO NOT READ THE RESPONSE, PROBE FOR MORE)                     | TO LOOK AFTER YOUNGER SIBLINGS ..... A<br>TO DO HOUSEHOLD CHORES ..... B<br>TO WORK ON FARM/FIELDS ..... C<br>MIGRATION FOR WORK WITHIN DISTRICT ..... D<br>MIGRATION FOR WORK OUTSIDE DISTRICT WITHIN STATE ..... E<br>MIGRATION FOR WORK OUTSIDE STATE ..... F<br>SICKNESS ..... G<br>OTHER (SPECIFY) ..... X<br>DIDN'T MISS ANY CLASS IN THE LAST MONTH . 95                                                                                         | } 407 |
| 405                                                                                                                                                                                      | When did you drop-out of school?<br><br>By drop-out we mean when was the first time you did not attend school for 3 or more months                                | DURATION SINCE DROP-OUT IN MONTHS <input type="text"/> <input type="text"/><br>DON'T REMEMBER ..... 98                                                                                                                                                                                                                                                                                                                                                  |       |
| 406                                                                                                                                                                                      | What is the main reason for drop-out of school?<br><br>(Do not read the options)                                                                                  | SCHOOL TO FAR AWAY ..... 1<br>TRANSPORT NOT AVAILABLE ..... 2<br>I DO NOT WANT TO ..... 3<br>PARENTS/GUARDIAN DO NOT WANT ME TO ..... 4<br>HUSBAND DOES NOT WANT ME TO ..... 5<br>REQUIRED FOR HOUSEHOLD WORK ..... 6<br>REQUIRED FOR WORK ON FARM/FAMILY BUSINESS ..... 7<br>REQUIRED FOR OUTSIDE WORK FOR PAYMENT IN CASH OR KIND ..... 8<br>COSTS TOO MUCH ..... 9<br>NO PROPER SCHOOL FACILITIES FOR GIRLS .. 10<br>NOT SAFE TO SEND GIRLS ..... 11 |       |

|                           |                                                                                                                                               |                                                                                                                                                                                                                                                                                  |        |
|---------------------------|-----------------------------------------------------------------------------------------------------------------------------------------------|----------------------------------------------------------------------------------------------------------------------------------------------------------------------------------------------------------------------------------------------------------------------------------|--------|
|                           |                                                                                                                                               | NO FEMALE TEACHER ..... 12<br>REQUIRED FOR CARE OF SIBLINGS .. 13<br>GOT MARRIED ..... 14<br>DID NOT GET ADMISSION/ ..... 15<br>HAD PROBLEMS WITH A TEACHER ..... 16<br>HARASSED OR HAD PROBLEMS WITH OTHER STUDENTS ..... 17<br>OTHER (SPECIFY) ..... 96<br>DON'T KNOW ..... 98 |        |
| 407                       | In your opinion, how likely is it that you will complete the entire school year next year?                                                    | VERY LIKELY ..... 1<br>SOMEWHAT LIKELY ..... 2<br>NOT AT ALL LIKEY ..... 3<br>DON'T KNOW ..... 98                                                                                                                                                                                |        |
| 408                       | In your opinion, how likely is it that you will complete 10 <sup>th</sup> standard?                                                           | VERY LIKELY ..... 1<br>SOMEWHAT LIKELY ..... 2<br>NOT AT ALL LIKEY ..... 3<br>DON'T KNOW ..... 98                                                                                                                                                                                |        |
| <b>MIGRATION AND WORK</b> |                                                                                                                                               |                                                                                                                                                                                                                                                                                  |        |
| 408a                      | Do you do work in the home, such as look after siblings, household chores, etc?                                                               | YES ..... 1<br>NO ..... 0                                                                                                                                                                                                                                                        | → 408d |
| 408b                      | If yes, on the last school day you went to school, how many hours of housework, washing, tending animals, or caring for relatives did you do? | NUMBER OF HOURS ..... <input type="text"/> <input type="text"/><br>DON'T KNOW ..... 98                                                                                                                                                                                           |        |
| 408c                      | On the last school day you did not go to school, how many hours of housework, washing, tending animals, or caring for relatives did you do?   | NUMBER OF HOURS ..... <input type="text"/> <input type="text"/><br>DIDN'T MISS ANY CLASS ..... 95<br>DON'T KNOW ..... 98                                                                                                                                                         |        |
| 408d                      | Have you ever engaged in a work where you were paid either in the form of money or in kind?                                                   | YES ..... 1<br>NO ..... 0<br>NO ANSWER ..... 99                                                                                                                                                                                                                                  | } 408g |
| 408e                      | Have you ever engaged in a work where you were paid either in the form money or in kind in the past 12 months?                                | YES ..... 1<br>NO ..... 0<br>NO ANSWER ..... 99                                                                                                                                                                                                                                  | } 408g |
| 408f                      | What kinds of work were you engaged in the past 12 months?                                                                                    | GRAPE CUTTING ..... A<br>SUGAR CANES CUTTING ..... B<br>HARVESTING ..... C<br>WEEDING ..... D<br>SOWING ..... E<br>PICKING COTTON ..... F<br>CONSTRUCTION WORK ..... G<br>OTHERS (SPECIFY) ..... X                                                                               |        |
| 408g                      | Have you ever travelled outside the district alone or with your family for work?                                                              | YES ..... 1<br>NO ..... 0<br>NO ANSWER ..... 99                                                                                                                                                                                                                                  | } 408j |

| NO.                                                         | QUESTIONS                                                                                                                                                                                                                   | CODING CATEGORIES                                                                                                                                                                          | SKIP   |
|-------------------------------------------------------------|-----------------------------------------------------------------------------------------------------------------------------------------------------------------------------------------------------------------------------|--------------------------------------------------------------------------------------------------------------------------------------------------------------------------------------------|--------|
| 408h                                                        | In the past 12 months, have you ever travelled outside the district alone or with your family for work?                                                                                                                     | YES ..... 1<br>NO ..... 0<br>NO ANSWER ..... 99                                                                                                                                            | } 408j |
| 408i                                                        | In the last 12 months, when you travelled outside the district because either you or your family were working, have you had an occasion where you missed the school?                                                        | YES ..... 1<br>NO ..... 0<br>DROPPED SCHOOL BEFORE LAST 12 MONTHS .... 95<br>NO ANSWER ..... 99                                                                                            |        |
| NO.                                                         | QUESTIONS                                                                                                                                                                                                                   | CODING CATEGORIES                                                                                                                                                                          | SKIP   |
| 408j                                                        | Have you ever travelled within the district alone or with your family for work?                                                                                                                                             | YES ..... 1<br>NO ..... 0<br>NO ANSWER ..... 99                                                                                                                                            | } 408m |
| 408k                                                        | In the past 12 months, have you ever travelled within the district alone or with your family for work?                                                                                                                      | YES ..... 1<br>NO ..... 0<br>NO ANSWER ..... 99                                                                                                                                            |        |
| 408l                                                        | In the last 12 months, when you travelled within the district because either you or your family were working, have you had an occasion where you missed the school?                                                         | YES ..... 1<br>NO ..... 0<br>DROPPED SCHOOL BEFORE LAST 12 MONTHS .... 95<br>NO ANSWER ..... 99                                                                                            |        |
| 408m                                                        | Approximately how many days in the last 12 months have you missed school because you or your family were working for money?                                                                                                 | NUMBER OF DAYS MISSED CLASS ..... <input type="text"/> <input type="text"/><br>DID NOT MISS SCHOOL ..... 94<br>DROPPED SCHOOL BEFORE LAST 12 MONTHS .... 95<br>DON'T KNOW ..... 98         |        |
| 408n                                                        | On the last school day you missed because you were working for money, how many hours of work did you do?                                                                                                                    | NUMBER OF HOURS ..... <input type="text"/> <input type="text"/><br>DID NOT MISS SCHOOL ..... 95<br>DON'T KNOW ..... 98                                                                     |        |
| <b>KNOWLEDGE OF GIRLS WORKING IN MAJOR CITIES ELSEWHERE</b> |                                                                                                                                                                                                                             |                                                                                                                                                                                            |        |
| 408o                                                        | Sometimes girls from villages in this area go to the Sangli, Satara, Solapur, Mumbai, Thane and Pune districts.<br>Do you know of any girls in your village who have gone to these districts to work in the past 12 months? | YES ..... 1<br>NO ..... 0<br>DON'T KNOW ..... 98                                                                                                                                           | } 409  |
| 408p                                                        | If yes, which cities have they gone to in the past 12 months?                                                                                                                                                               | CITY NAME 1 . _____<br>CITY NAME 2 . _____<br>CITY NAME 3 . _____                                                                                                                          |        |
| 408q                                                        | If yes, do you know what kind of work they do?                                                                                                                                                                              | AGRICULTURAL LABOUR ..... A<br>NON AGRICULTURAL LABOUR ..... B<br>GARMENTS WORK ..... C<br>CONSTRUCTION WORK ..... D<br>SEX WORK ..... E<br>OTHERS (SPECIFY) ..... X<br>DON'T KNOW ..... Y |        |

| NO.                                                                            | QUESTIONS                                                                                                                                                                                                                                            | CODING CATEGORIES                                                                                                                                                                                                                                                                                                                                                                                                                                                                                                                                                                                                                                                                                                                                                                                                                                                                                                                                                                                                                                                                     |                 |                    | SKIP |     |    |                         |   |   |                                |   |   |                         |   |   |                           |   |   |                                  |   |   |                                    |   |   |                         |   |   |                                                    |   |   |                                                        |   |   |                                                       |   |   |                                                |   |   |                               |   |   |  |
|--------------------------------------------------------------------------------|------------------------------------------------------------------------------------------------------------------------------------------------------------------------------------------------------------------------------------------------------|---------------------------------------------------------------------------------------------------------------------------------------------------------------------------------------------------------------------------------------------------------------------------------------------------------------------------------------------------------------------------------------------------------------------------------------------------------------------------------------------------------------------------------------------------------------------------------------------------------------------------------------------------------------------------------------------------------------------------------------------------------------------------------------------------------------------------------------------------------------------------------------------------------------------------------------------------------------------------------------------------------------------------------------------------------------------------------------|-----------------|--------------------|------|-----|----|-------------------------|---|---|--------------------------------|---|---|-------------------------|---|---|---------------------------|---|---|----------------------------------|---|---|------------------------------------|---|---|-------------------------|---|---|----------------------------------------------------|---|---|--------------------------------------------------------|---|---|-------------------------------------------------------|---|---|------------------------------------------------|---|---|-------------------------------|---|---|--|
| <b>Accessibility of secondary school to young SC/ST Girls</b>                  |                                                                                                                                                                                                                                                      |                                                                                                                                                                                                                                                                                                                                                                                                                                                                                                                                                                                                                                                                                                                                                                                                                                                                                                                                                                                                                                                                                       |                 |                    |      |     |    |                         |   |   |                                |   |   |                         |   |   |                           |   |   |                                  |   |   |                                    |   |   |                         |   |   |                                                    |   |   |                                                        |   |   |                                                       |   |   |                                                |   |   |                               |   |   |  |
| 409                                                                            | In your village, how difficult is it for girls like you to complete secondary school?                                                                                                                                                                | VERY DIFFICULT .....                                                                                                                                                                                                                                                                                                                                                                                                                                                                                                                                                                                                                                                                                                                                                                                                                                                                                                                                                                                                                                                                  | 1               |                    |      |     |    |                         |   |   |                                |   |   |                         |   |   |                           |   |   |                                  |   |   |                                    |   |   |                         |   |   |                                                    |   |   |                                                        |   |   |                                                       |   |   |                                                |   |   |                               |   |   |  |
|                                                                                |                                                                                                                                                                                                                                                      | SOMEWHAT DIFFICULT .....                                                                                                                                                                                                                                                                                                                                                                                                                                                                                                                                                                                                                                                                                                                                                                                                                                                                                                                                                                                                                                                              | 2               |                    |      |     |    |                         |   |   |                                |   |   |                         |   |   |                           |   |   |                                  |   |   |                                    |   |   |                         |   |   |                                                    |   |   |                                                        |   |   |                                                       |   |   |                                                |   |   |                               |   |   |  |
|                                                                                |                                                                                                                                                                                                                                                      | NOT VERY DIFFICULT .....                                                                                                                                                                                                                                                                                                                                                                                                                                                                                                                                                                                                                                                                                                                                                                                                                                                                                                                                                                                                                                                              | 3               |                    |      |     |    |                         |   |   |                                |   |   |                         |   |   |                           |   |   |                                  |   |   |                                    |   |   |                         |   |   |                                                    |   |   |                                                        |   |   |                                                       |   |   |                                                |   |   |                               |   |   |  |
|                                                                                |                                                                                                                                                                                                                                                      | DON'T KNOW .....                                                                                                                                                                                                                                                                                                                                                                                                                                                                                                                                                                                                                                                                                                                                                                                                                                                                                                                                                                                                                                                                      | 98              |                    |      |     |    |                         |   |   |                                |   |   |                         |   |   |                           |   |   |                                  |   |   |                                    |   |   |                         |   |   |                                                    |   |   |                                                        |   |   |                                                       |   |   |                                                |   |   |                               |   |   |  |
| 410                                                                            | Now I'm going to read a list of challenges and I want you to tell me how much they interfere with girls like you being able to complete their secondary education? For each item, please answer either: A lot, Somewhat, or Not so much              |                                                                                                                                                                                                                                                                                                                                                                                                                                                                                                                                                                                                                                                                                                                                                                                                                                                                                                                                                                                                                                                                                       |                 |                    |      |     |    |                         |   |   |                                |   |   |                         |   |   |                           |   |   |                                  |   |   |                                    |   |   |                         |   |   |                                                    |   |   |                                                        |   |   |                                                       |   |   |                                                |   |   |                               |   |   |  |
|                                                                                |                                                                                                                                                                                                                                                      | <b>A LOT</b>                                                                                                                                                                                                                                                                                                                                                                                                                                                                                                                                                                                                                                                                                                                                                                                                                                                                                                                                                                                                                                                                          | <b>SOMEWHAT</b> | <b>NOT SO MUCH</b> |      |     |    |                         |   |   |                                |   |   |                         |   |   |                           |   |   |                                  |   |   |                                    |   |   |                         |   |   |                                                    |   |   |                                                        |   |   |                                                       |   |   |                                                |   |   |                               |   |   |  |
| A                                                                              | Paying for fees, books, uniforms and other school-related costs                                                                                                                                                                                      | 1                                                                                                                                                                                                                                                                                                                                                                                                                                                                                                                                                                                                                                                                                                                                                                                                                                                                                                                                                                                                                                                                                     | 2               | 3                  |      |     |    |                         |   |   |                                |   |   |                         |   |   |                           |   |   |                                  |   |   |                                    |   |   |                         |   |   |                                                    |   |   |                                                        |   |   |                                                       |   |   |                                                |   |   |                               |   |   |  |
| B                                                                              | Getting to and from school                                                                                                                                                                                                                           | 1                                                                                                                                                                                                                                                                                                                                                                                                                                                                                                                                                                                                                                                                                                                                                                                                                                                                                                                                                                                                                                                                                     | 2               | 3                  |      |     |    |                         |   |   |                                |   |   |                         |   |   |                           |   |   |                                  |   |   |                                    |   |   |                         |   |   |                                                    |   |   |                                                        |   |   |                                                       |   |   |                                                |   |   |                               |   |   |  |
| C                                                                              | Fear of harassment or teasing from boys                                                                                                                                                                                                              | 1                                                                                                                                                                                                                                                                                                                                                                                                                                                                                                                                                                                                                                                                                                                                                                                                                                                                                                                                                                                                                                                                                     | 2               | 3                  |      |     |    |                         |   |   |                                |   |   |                         |   |   |                           |   |   |                                  |   |   |                                    |   |   |                         |   |   |                                                    |   |   |                                                        |   |   |                                                       |   |   |                                                |   |   |                               |   |   |  |
| D                                                                              | Lack of decent toilet facilities for girls at school                                                                                                                                                                                                 | 1                                                                                                                                                                                                                                                                                                                                                                                                                                                                                                                                                                                                                                                                                                                                                                                                                                                                                                                                                                                                                                                                                     | 2               | 3                  |      |     |    |                         |   |   |                                |   |   |                         |   |   |                           |   |   |                                  |   |   |                                    |   |   |                         |   |   |                                                    |   |   |                                                        |   |   |                                                       |   |   |                                                |   |   |                               |   |   |  |
| E                                                                              | Poor treatment of girls by teachers                                                                                                                                                                                                                  | 1                                                                                                                                                                                                                                                                                                                                                                                                                                                                                                                                                                                                                                                                                                                                                                                                                                                                                                                                                                                                                                                                                     | 2               | 3                  |      |     |    |                         |   |   |                                |   |   |                         |   |   |                           |   |   |                                  |   |   |                                    |   |   |                         |   |   |                                                    |   |   |                                                        |   |   |                                                       |   |   |                                                |   |   |                               |   |   |  |
| 411                                                                            | We know that there are sometimes problems in schools. Thinking now about your current school (or the last one you attended), which of the following descriptions would you say apply?<br><br><b>(READ OUT THE LIST AND TICK ALL SHE SAYS APPLY.)</b> | <table border="0"> <thead> <tr> <th></th> <th>YES</th> <th>NO</th> </tr> </thead> <tbody> <tr> <td>A. NOT ENOUGH TEXTBOOKS</td> <td>1</td> <td>0</td> </tr> <tr> <td>B. QUALITY OF TEACHERS IS POOR</td> <td>1</td> <td>0</td> </tr> <tr> <td>C. CLASSROOMS ARE DIRTY</td> <td>1</td> <td>0</td> </tr> <tr> <td>D. CLASSROOMS ARE CROWDED</td> <td>1</td> <td>0</td> </tr> <tr> <td>E. NO SEPARATE TOILETS FOR GIRLS</td> <td>1</td> <td>0</td> </tr> <tr> <td>F. TEACHER OFTEN ABSENT FROM CLASS</td> <td>1</td> <td>0</td> </tr> <tr> <td>G. TEACHERS DRUNK .....</td> <td>1</td> <td>0</td> </tr> <tr> <td>H. GIRLS ARE TREATED POORLY COMPARED TO BOYS .....</td> <td>1</td> <td>0</td> </tr> <tr> <td>I. SEXUAL HARASSMENT OF GIRLS BY OTHER STUDENTS/ .....</td> <td>1</td> <td>0</td> </tr> <tr> <td>J. SEXUAL HARASSMENT OF GIRLS BY TEACHERS/STAFF .....</td> <td>1</td> <td>0</td> </tr> <tr> <td>K. HARSH PHYSICAL PUNISHMENT BY TEACHERS .....</td> <td>1</td> <td>0</td> </tr> <tr> <td>L. BULLYING BY OTHER STUDENTS</td> <td>1</td> <td>0</td> </tr> </tbody> </table> |                 |                    |      | YES | NO | A. NOT ENOUGH TEXTBOOKS | 1 | 0 | B. QUALITY OF TEACHERS IS POOR | 1 | 0 | C. CLASSROOMS ARE DIRTY | 1 | 0 | D. CLASSROOMS ARE CROWDED | 1 | 0 | E. NO SEPARATE TOILETS FOR GIRLS | 1 | 0 | F. TEACHER OFTEN ABSENT FROM CLASS | 1 | 0 | G. TEACHERS DRUNK ..... | 1 | 0 | H. GIRLS ARE TREATED POORLY COMPARED TO BOYS ..... | 1 | 0 | I. SEXUAL HARASSMENT OF GIRLS BY OTHER STUDENTS/ ..... | 1 | 0 | J. SEXUAL HARASSMENT OF GIRLS BY TEACHERS/STAFF ..... | 1 | 0 | K. HARSH PHYSICAL PUNISHMENT BY TEACHERS ..... | 1 | 0 | L. BULLYING BY OTHER STUDENTS | 1 | 0 |  |
|                                                                                | YES                                                                                                                                                                                                                                                  | NO                                                                                                                                                                                                                                                                                                                                                                                                                                                                                                                                                                                                                                                                                                                                                                                                                                                                                                                                                                                                                                                                                    |                 |                    |      |     |    |                         |   |   |                                |   |   |                         |   |   |                           |   |   |                                  |   |   |                                    |   |   |                         |   |   |                                                    |   |   |                                                        |   |   |                                                       |   |   |                                                |   |   |                               |   |   |  |
| A. NOT ENOUGH TEXTBOOKS                                                        | 1                                                                                                                                                                                                                                                    | 0                                                                                                                                                                                                                                                                                                                                                                                                                                                                                                                                                                                                                                                                                                                                                                                                                                                                                                                                                                                                                                                                                     |                 |                    |      |     |    |                         |   |   |                                |   |   |                         |   |   |                           |   |   |                                  |   |   |                                    |   |   |                         |   |   |                                                    |   |   |                                                        |   |   |                                                       |   |   |                                                |   |   |                               |   |   |  |
| B. QUALITY OF TEACHERS IS POOR                                                 | 1                                                                                                                                                                                                                                                    | 0                                                                                                                                                                                                                                                                                                                                                                                                                                                                                                                                                                                                                                                                                                                                                                                                                                                                                                                                                                                                                                                                                     |                 |                    |      |     |    |                         |   |   |                                |   |   |                         |   |   |                           |   |   |                                  |   |   |                                    |   |   |                         |   |   |                                                    |   |   |                                                        |   |   |                                                       |   |   |                                                |   |   |                               |   |   |  |
| C. CLASSROOMS ARE DIRTY                                                        | 1                                                                                                                                                                                                                                                    | 0                                                                                                                                                                                                                                                                                                                                                                                                                                                                                                                                                                                                                                                                                                                                                                                                                                                                                                                                                                                                                                                                                     |                 |                    |      |     |    |                         |   |   |                                |   |   |                         |   |   |                           |   |   |                                  |   |   |                                    |   |   |                         |   |   |                                                    |   |   |                                                        |   |   |                                                       |   |   |                                                |   |   |                               |   |   |  |
| D. CLASSROOMS ARE CROWDED                                                      | 1                                                                                                                                                                                                                                                    | 0                                                                                                                                                                                                                                                                                                                                                                                                                                                                                                                                                                                                                                                                                                                                                                                                                                                                                                                                                                                                                                                                                     |                 |                    |      |     |    |                         |   |   |                                |   |   |                         |   |   |                           |   |   |                                  |   |   |                                    |   |   |                         |   |   |                                                    |   |   |                                                        |   |   |                                                       |   |   |                                                |   |   |                               |   |   |  |
| E. NO SEPARATE TOILETS FOR GIRLS                                               | 1                                                                                                                                                                                                                                                    | 0                                                                                                                                                                                                                                                                                                                                                                                                                                                                                                                                                                                                                                                                                                                                                                                                                                                                                                                                                                                                                                                                                     |                 |                    |      |     |    |                         |   |   |                                |   |   |                         |   |   |                           |   |   |                                  |   |   |                                    |   |   |                         |   |   |                                                    |   |   |                                                        |   |   |                                                       |   |   |                                                |   |   |                               |   |   |  |
| F. TEACHER OFTEN ABSENT FROM CLASS                                             | 1                                                                                                                                                                                                                                                    | 0                                                                                                                                                                                                                                                                                                                                                                                                                                                                                                                                                                                                                                                                                                                                                                                                                                                                                                                                                                                                                                                                                     |                 |                    |      |     |    |                         |   |   |                                |   |   |                         |   |   |                           |   |   |                                  |   |   |                                    |   |   |                         |   |   |                                                    |   |   |                                                        |   |   |                                                       |   |   |                                                |   |   |                               |   |   |  |
| G. TEACHERS DRUNK .....                                                        | 1                                                                                                                                                                                                                                                    | 0                                                                                                                                                                                                                                                                                                                                                                                                                                                                                                                                                                                                                                                                                                                                                                                                                                                                                                                                                                                                                                                                                     |                 |                    |      |     |    |                         |   |   |                                |   |   |                         |   |   |                           |   |   |                                  |   |   |                                    |   |   |                         |   |   |                                                    |   |   |                                                        |   |   |                                                       |   |   |                                                |   |   |                               |   |   |  |
| H. GIRLS ARE TREATED POORLY COMPARED TO BOYS .....                             | 1                                                                                                                                                                                                                                                    | 0                                                                                                                                                                                                                                                                                                                                                                                                                                                                                                                                                                                                                                                                                                                                                                                                                                                                                                                                                                                                                                                                                     |                 |                    |      |     |    |                         |   |   |                                |   |   |                         |   |   |                           |   |   |                                  |   |   |                                    |   |   |                         |   |   |                                                    |   |   |                                                        |   |   |                                                       |   |   |                                                |   |   |                               |   |   |  |
| I. SEXUAL HARASSMENT OF GIRLS BY OTHER STUDENTS/ .....                         | 1                                                                                                                                                                                                                                                    | 0                                                                                                                                                                                                                                                                                                                                                                                                                                                                                                                                                                                                                                                                                                                                                                                                                                                                                                                                                                                                                                                                                     |                 |                    |      |     |    |                         |   |   |                                |   |   |                         |   |   |                           |   |   |                                  |   |   |                                    |   |   |                         |   |   |                                                    |   |   |                                                        |   |   |                                                       |   |   |                                                |   |   |                               |   |   |  |
| J. SEXUAL HARASSMENT OF GIRLS BY TEACHERS/STAFF .....                          | 1                                                                                                                                                                                                                                                    | 0                                                                                                                                                                                                                                                                                                                                                                                                                                                                                                                                                                                                                                                                                                                                                                                                                                                                                                                                                                                                                                                                                     |                 |                    |      |     |    |                         |   |   |                                |   |   |                         |   |   |                           |   |   |                                  |   |   |                                    |   |   |                         |   |   |                                                    |   |   |                                                        |   |   |                                                       |   |   |                                                |   |   |                               |   |   |  |
| K. HARSH PHYSICAL PUNISHMENT BY TEACHERS .....                                 | 1                                                                                                                                                                                                                                                    | 0                                                                                                                                                                                                                                                                                                                                                                                                                                                                                                                                                                                                                                                                                                                                                                                                                                                                                                                                                                                                                                                                                     |                 |                    |      |     |    |                         |   |   |                                |   |   |                         |   |   |                           |   |   |                                  |   |   |                                    |   |   |                         |   |   |                                                    |   |   |                                                        |   |   |                                                       |   |   |                                                |   |   |                               |   |   |  |
| L. BULLYING BY OTHER STUDENTS                                                  | 1                                                                                                                                                                                                                                                    | 0                                                                                                                                                                                                                                                                                                                                                                                                                                                                                                                                                                                                                                                                                                                                                                                                                                                                                                                                                                                                                                                                                     |                 |                    |      |     |    |                         |   |   |                                |   |   |                         |   |   |                           |   |   |                                  |   |   |                                    |   |   |                         |   |   |                                                    |   |   |                                                        |   |   |                                                       |   |   |                                                |   |   |                               |   |   |  |
| <b>Now I'm going to ask you some questions about your hopes for the future</b> |                                                                                                                                                                                                                                                      |                                                                                                                                                                                                                                                                                                                                                                                                                                                                                                                                                                                                                                                                                                                                                                                                                                                                                                                                                                                                                                                                                       |                 |                    |      |     |    |                         |   |   |                                |   |   |                         |   |   |                           |   |   |                                  |   |   |                                    |   |   |                         |   |   |                                                    |   |   |                                                        |   |   |                                                       |   |   |                                                |   |   |                               |   |   |  |
| 412                                                                            | How important is it to you that you complete secondary school?                                                                                                                                                                                       | VERY IMPORTANT .....                                                                                                                                                                                                                                                                                                                                                                                                                                                                                                                                                                                                                                                                                                                                                                                                                                                                                                                                                                                                                                                                  | 1               |                    |      |     |    |                         |   |   |                                |   |   |                         |   |   |                           |   |   |                                  |   |   |                                    |   |   |                         |   |   |                                                    |   |   |                                                        |   |   |                                                       |   |   |                                                |   |   |                               |   |   |  |
|                                                                                |                                                                                                                                                                                                                                                      | SOMEWHAT IMPORTANT .....                                                                                                                                                                                                                                                                                                                                                                                                                                                                                                                                                                                                                                                                                                                                                                                                                                                                                                                                                                                                                                                              | 2               |                    |      |     |    |                         |   |   |                                |   |   |                         |   |   |                           |   |   |                                  |   |   |                                    |   |   |                         |   |   |                                                    |   |   |                                                        |   |   |                                                       |   |   |                                                |   |   |                               |   |   |  |
|                                                                                |                                                                                                                                                                                                                                                      | NOT AT ALL IMPORTANT .....                                                                                                                                                                                                                                                                                                                                                                                                                                                                                                                                                                                                                                                                                                                                                                                                                                                                                                                                                                                                                                                            | 3               |                    |      |     |    |                         |   |   |                                |   |   |                         |   |   |                           |   |   |                                  |   |   |                                    |   |   |                         |   |   |                                                    |   |   |                                                        |   |   |                                                       |   |   |                                                |   |   |                               |   |   |  |
|                                                                                |                                                                                                                                                                                                                                                      | DON'T KNOW .....                                                                                                                                                                                                                                                                                                                                                                                                                                                                                                                                                                                                                                                                                                                                                                                                                                                                                                                                                                                                                                                                      | 98              |                    |      |     |    |                         |   |   |                                |   |   |                         |   |   |                           |   |   |                                  |   |   |                                    |   |   |                         |   |   |                                                    |   |   |                                                        |   |   |                                                       |   |   |                                                |   |   |                               |   |   |  |

| NO.                                                                                                              | QUESTIONS                                                                                                                                                                                                                                                  | CODING CATEGORIES                                                                                                                                                                                                                                                            | SKIP  |
|------------------------------------------------------------------------------------------------------------------|------------------------------------------------------------------------------------------------------------------------------------------------------------------------------------------------------------------------------------------------------------|------------------------------------------------------------------------------------------------------------------------------------------------------------------------------------------------------------------------------------------------------------------------------|-------|
| 413                                                                                                              | CHECK Q 330: CODE '5' OR '6' <input type="checkbox"/><br>CIRCLED ↓                                                                                                                                                                                         | CODE '1','2','3','4' <input type="checkbox"/><br>CIRCLED                                                                                                                                                                                                                     | → 416 |
| 414                                                                                                              | How important is it to you that you marry someday?                                                                                                                                                                                                         | VERY IMPORTANT ..... 1<br>SOMEWHAT IMPORTANT ..... 2<br>NOT AT ALL IMPORTANT ..... 3<br>DON'T KNOW ..... 98                                                                                                                                                                  |       |
| 415                                                                                                              | How important is it to you that you marry before age 18?                                                                                                                                                                                                   | VERY IMPORTANT ..... 1<br>SOMEWHAT IMPORTANT ..... 2<br>NOT AT ALL IMPORTANT ..... 3<br>DON'T KNOW ..... 98                                                                                                                                                                  |       |
| 416                                                                                                              | How important is it to you that you have steady employment when you are an adult?                                                                                                                                                                          | VERY IMPORTANT ..... 1<br>SOMEWHAT IMPORTANT ..... 2<br>NOT AT ALL IMPORTANT ..... 3<br>DON'T KNOW ..... 98                                                                                                                                                                  |       |
| 417                                                                                                              | In your opinion, how would completing secondary school education benefit you and other girls in your community?<br><b>DO NOT READ OUT THE RESPONSES</b><br><br><b>(MULTIPLE RESPONSE POSSIBLE)</b><br><b>(Probe: Can you think of any other benefits?)</b> | BETTER JOBS ..... A<br>GREATER RESPECT BY OTHERS .. B<br>BETTER HUSBAND ..... C<br>DELAYED MARRIAGE ..... D<br>HEALTHIER CHILDREN ..... E<br>MORE CONFIDENCE/SELF ESTEEM ..... F<br>OPENS OPTIONS FOR HIGHER EDUCATION . G<br>OTHER (SPECIFY) ..... X<br>NO BENEFITS ..... Y |       |
| <b>Now I'm going to ask you the same questions but I want you to tell me your parents views on these matters</b> |                                                                                                                                                                                                                                                            |                                                                                                                                                                                                                                                                              |       |
| 418                                                                                                              | How important is it to <b>your parents</b> that you transition into secondary school (enter 8th standard?)<br><b>(Probe: is that very important, somewhat important, or not at all important to them)</b>                                                  | VERY IMPORTANT ..... 1<br>SOMEWHAT IMPORTANT ..... 2<br>NOT AT ALL IMPORTANT ..... 3<br>DON'T KNOW ..... 98                                                                                                                                                                  |       |
| 419                                                                                                              | How important is it to <b>your parents</b> that you complete secondary school (class 10)                                                                                                                                                                   | VERY IMPORTANT ..... 1<br>SOMEWHAT IMPORTANT ..... 2<br>NOT AT ALL IMPORTANT ..... 3<br>DON'T KNOW ..... 98                                                                                                                                                                  |       |
| 420                                                                                                              | CHECK Q 330:<br>CODE '5' OR '6' <input type="checkbox"/><br>CIRCLED ↓                                                                                                                                                                                      | CODE '1','2','3','4' <input type="checkbox"/><br>CIRCLED                                                                                                                                                                                                                     | → 423 |
| 421                                                                                                              | How important is it to <b>your parents</b> that you get married some day?                                                                                                                                                                                  | VERY IMPORTANT ..... 1<br>SOMEWHAT IMPORTANT ..... 2<br>NOT AT ALL IMPORTANT ..... 3<br>DON'T KNOW ..... 98                                                                                                                                                                  |       |
| 422                                                                                                              | How important is it to them that you marry before age 18?                                                                                                                                                                                                  | VERY IMPORTANT ..... 1<br>SOMEWHAT IMPORTANT ..... 2<br>NOT AT ALL IMPORTANT ..... 3<br>DON'T KNOW ..... 98                                                                                                                                                                  | } 424 |

| NO. | QUESTIONS                                                                                                                          | CODING CATEGORIES    |                       |                          |                   | SKIP                       |   |                      |    |                  |    |
|-----|------------------------------------------------------------------------------------------------------------------------------------|----------------------|-----------------------|--------------------------|-------------------|----------------------------|---|----------------------|----|------------------|----|
| 423 | How important is it to your husband that you complete secondary school?                                                            | VERY IMPORTANT ..... | 1                     | SOMEWHAT IMPORTANT ..... | 2                 | NOT AT ALL IMPORTANT ..... | 3 | NOT APPLICABLE ..... | 97 | DON'T KNOW ..... | 98 |
| 424 | How important is it to <b>your parents</b> that you have steady employment when you are an adult?                                  | VERY IMPORTANT ..... | 1                     | SOMEWHAT IMPORTANT ..... | 2                 | NOT AT ALL IMPORTANT ..... | 3 | DON'T KNOW .....     | 98 |                  |    |
| 425 | Now I'm going to read a set of statements, and for each one, I want you to tell me whether you Agree, Somewhat Agree, or Disagree. |                      |                       |                          |                   |                            |   |                      |    |                  |    |
|     | <b>STATEMENTS</b>                                                                                                                  | <b>AGREE</b>         | <b>SOMEWHAT AGREE</b> | <b>DO NOT AGREE</b>      | <b>DON'T KNOW</b> |                            |   |                      |    |                  |    |
| A   | It is more important to send a son to school than to send a daughter                                                               | 1                    | 2                     | 3                        | 98                |                            |   |                      |    |                  |    |
| B   | A wife should always obey her husband.                                                                                             | 1                    | 2                     | 3                        | 98                |                            |   |                      |    |                  |    |
| C   | Girls should be married as soon as they menstruate                                                                                 | 1                    | 2                     | 3                        | 98                |                            |   |                      |    |                  |    |
| D   | It is equally important to raise a daughter to be strong and independent as it is a son                                            | 1                    | 2                     | 3                        | 98                |                            |   |                      |    |                  |    |
| E1  | Girls who are harassed or teased encourage it by the way they act                                                                  | 1                    | 2                     | 3                        | 98                |                            |   |                      |    |                  |    |
| E2  | Girls who are harassed or teased encourage it by the way they dress                                                                | 1                    | 2                     | 3                        | 98                |                            |   |                      |    |                  |    |
| F   | Daughters should be sent to school only if they are not needed to help at home                                                     | 1                    | 2                     | 3                        | 98                |                            |   |                      |    |                  |    |
| G   | Girls should have the same rights and freedoms as boys.                                                                            | 1                    | 2                     | 3                        | 98                |                            |   |                      |    |                  |    |
| H   | It is okay for a husband to beat his wife if she has done something wrong                                                          | 1                    | 2                     | 3                        | 98                |                            |   |                      |    |                  |    |
| I   | It is equally important to encourage daughters to get an education as it is with sons                                              | 1                    | 2                     | 3                        | 98                |                            |   |                      |    |                  |    |
| J   | In general, educated girls become rebellious and don't make good wives                                                             | 1                    | 2                     | 3                        | 98                |                            |   |                      |    |                  |    |
| K1  | One can't expect boys not to tease girls                                                                                           | 1                    | 2                     | 3                        | 98                |                            |   |                      |    |                  |    |
| K2  | Best way to protect girls is to keep them at home                                                                                  | 1                    | 2                     | 3                        | 98                |                            |   |                      |    |                  |    |
| L   | Girls should have a say in who they marry                                                                                          | 1                    | 2                     | 3                        | 98                |                            |   |                      |    |                  |    |
| M   | If there is limited money to pay for tutoring, it should be spent first on sons                                                    | 1                    | 2                     | 3                        | 98                |                            |   |                      |    |                  |    |
| N   | Girls should not be expected to serve or wait on their brothers                                                                    | 1                    | 2                     | 3                        | 98                |                            |   |                      |    |                  |    |

| <b>BLOCK V: SOCIAL NORMS</b>                                             |                                                                                                                                                                                                                                                                                        |                    |                        |                     |                   |  |
|--------------------------------------------------------------------------|----------------------------------------------------------------------------------------------------------------------------------------------------------------------------------------------------------------------------------------------------------------------------------------|--------------------|------------------------|---------------------|-------------------|--|
| <b>EMPIRICAL EXPECTATIONS</b>                                            |                                                                                                                                                                                                                                                                                        |                    |                        |                     |                   |  |
| 501                                                                      | Now I would like to ask you about what is common in your village. For each statement, tell me whether you agree, somewhat agree or disagree.                                                                                                                                           |                    |                        |                     |                   |  |
|                                                                          | <b>STATEMENTS</b>                                                                                                                                                                                                                                                                      | <b>AGREE</b>       | <b>SOMEWHAT AGREE</b>  | <b>DO NOT AGREE</b> | <b>DON'T KNOW</b> |  |
| A                                                                        | The majority of families in my village do not send their girls to secondary school                                                                                                                                                                                                     | 1                  | 2                      | 3                   | 98                |  |
| B                                                                        | The majority of families in my village educate their sons longer than their daughters                                                                                                                                                                                                  | 1                  | 2                      | 3                   | 98                |  |
| C                                                                        | The majority of families in my village get their daughters married before age 18                                                                                                                                                                                                       | 1                  | 2                      | 3                   | 98                |  |
| D                                                                        | The majority of families in my village do not give girls equal freedom as boys                                                                                                                                                                                                         | 1                  | 2                      | 3                   | 98                |  |
| E                                                                        | The majority of families in my village blame girls if they get teased or harassed.                                                                                                                                                                                                     | 1                  | 2                      | 3                   | 98                |  |
| <b>NORMATIVE EXPECTATIONS</b>                                            |                                                                                                                                                                                                                                                                                        |                    |                        |                     |                   |  |
| <b>[What others think I should do (Agree, Somewhat agree, Disagree)]</b> |                                                                                                                                                                                                                                                                                        |                    |                        |                     |                   |  |
| 502                                                                      | Now I want you to think of those people whose opinions matter most to you. I'm going to read another list of statements and I want you to again tell me whether you fully agree with the statement, agree somewhat but not completely, or disagree with the statement. OK, here we go: |                    |                        |                     |                   |  |
|                                                                          | <b>STATEMENTS</b>                                                                                                                                                                                                                                                                      | <b>AGREE</b>       | <b>SOMEWHAT AGREE</b>  | <b>DO NOT AGREE</b> | <b>DON'T KNOW</b> |  |
| A                                                                        | The majority of people important to me think I should complete secondary school                                                                                                                                                                                                        | 1                  | 2                      | 3                   | 98                |  |
| B                                                                        | The majority of people important to me think that it is less important for me to get an education than my brother                                                                                                                                                                      | 1                  | 2                      | 3                   | 98                |  |
| C                                                                        | The majority of people important to me think I should get married before age 18                                                                                                                                                                                                        | 1                  | 2                      | 3                   | 98                |  |
| D                                                                        | The majority of people important to me think I should not have as much freedom as my brothers                                                                                                                                                                                          | 1                  | 2                      | 3                   | 98                |  |
| E                                                                        | The majority of people important to me think that I should be blamed if I get teased or harassed.                                                                                                                                                                                      | 1                  | 2                      | 3                   | 98                |  |
| <b>CONSEQUENCES FOR DEPARTING FROM NORMS</b>                             |                                                                                                                                                                                                                                                                                        |                    |                        |                     |                   |  |
| 503                                                                      | If you complete your secondary education, how likely is it that the following consequences might occur? (Very likely, somewhat likely, not likely)                                                                                                                                     |                    |                        |                     |                   |  |
|                                                                          |                                                                                                                                                                                                                                                                                        | <b>VERY LIKELY</b> | <b>SOMEWHAT LIKELY</b> | <b>NOT LIKELY</b>   |                   |  |
| A                                                                        | You will be teased and harassed by local boys or men                                                                                                                                                                                                                                   | 1                  | 2                      | 3                   |                   |  |

|      |                                                                                                                                           | VERY<br>LIKELY | SOMEWHAT<br>LIKELY                                       | NOT LIKELY |             |
|------|-------------------------------------------------------------------------------------------------------------------------------------------|----------------|----------------------------------------------------------|------------|-------------|
| B    | You may encounter more arguments/conflicts with your parents                                                                              | 1              | 2                                                        | 3          |             |
| C    | You may find it more difficult to get married                                                                                             | 1              | 2                                                        | 3          |             |
| D    | You may be considered uppity and disobedient                                                                                              | 1              | 2                                                        | 3          |             |
| 503a | CHECK Q 330:<br>CODE '5','6','98','99' <input type="checkbox"/><br>CIRCLED                                                                |                | CODE '1','2','3','4' <input type="checkbox"/><br>CIRCLED |            | BLOCK<br>VI |
| 504  | If you do not get married by 18, how likely is it that the following consequences might occur (Very likely, somewhat likely, not likely). |                |                                                          |            |             |
|      |                                                                                                                                           | VERY<br>LIKELY | SOMEWHAT<br>LIKELY                                       | NOT LIKELY |             |
| A    | You may find it difficult to find a husband                                                                                               | 1              | 2                                                        | 3          |             |
| B    | You may be blamed for higher marriage expenses                                                                                            | 1              | 2                                                        | 3          |             |
| C    | You may disappoint your parents                                                                                                           | 1              | 2                                                        | 3          |             |
| D    | You may be dedicated as a Devadasi                                                                                                        | 1              | 2                                                        | 3          |             |

**BLOCK VI: SENSE OF SELF ESTEEM, ASPIRATIONS and CONFIDENCE**

**Self esteem, aspirations and confidence**

Now I am going to ask you some questions about how you feel about yourself and how confident you feel in different situations. There are no right or wrong answers to these questions and you do not need to answer any questions that you do not want to.

| 601 | Ask how much the respondent agree or do not agree with the following statements |       |                   |                 |                |  |
|-----|---------------------------------------------------------------------------------|-------|-------------------|-----------------|----------------|--|
|     | STATEMENTS                                                                      | AGREE | SOMEWHAT<br>AGREE | DO NOT<br>AGREE | DON'T<br>KNOW/ |  |
| A   | I feel I am as important as other siblings of my family.                        | 1     | 2                 | 3               | 98             |  |
| B   | If I work hard, I feel capable of achieving my goals                            | 1     | 2                 | 3               | 98             |  |
| C   | I can express my ideas well in school                                           | 1     | 2                 | 3               | 98             |  |
| D   | I feel as intelligent as most other people in my age.                           | 1     | 2                 | 3               | 98             |  |
| E   | I do not have hope for my future (R)                                            | 1     | 2                 | 3               | 98             |  |
| F   | I am optimistic that I will have a better life than my parents.                 | 1     | 2                 | 3               | 98             |  |
| G   | On the whole, I am satisfied with myself                                        | 1     | 2                 | 3               | 98             |  |



| SELF EFFICACY            |                                                                                                                                                                                                                                                     |                          |                       |                                                |                             |                              |                   |                   |
|--------------------------|-----------------------------------------------------------------------------------------------------------------------------------------------------------------------------------------------------------------------------------------------------|--------------------------|-----------------------|------------------------------------------------|-----------------------------|------------------------------|-------------------|-------------------|
| 602                      | Ask how much the respondent agree or do not agree with the following statements                                                                                                                                                                     |                          |                       |                                                |                             |                              |                   |                   |
|                          | <b>STATEMENTS</b>                                                                                                                                                                                                                                   | <b>AGREE</b>             | <b>SOMEWHAT AGREE</b> | <b>DO NOT AGREE</b>                            | <b>DON'T KNOW</b>           |                              |                   |                   |
| A                        | I feel able to talk to my parents about my hopes and aspirations                                                                                                                                                                                    | 1                        | 2                     | 3                                              | 98                          |                              |                   |                   |
| B                        | I can stand up for my right to be treated with the same respect as my brother.                                                                                                                                                                      | 1                        | 2                     | 3                                              | 98                          |                              |                   |                   |
| C                        | I can express my views on marriage even if they differ from those of my parents                                                                                                                                                                     | 1                        | 2                     | 3                                              | 98                          |                              |                   |                   |
| D                        | I can ask my parents to support my completion of secondary education                                                                                                                                                                                | 1                        | 2                     | 3                                              | 98                          |                              |                   |                   |
| E                        | I feel willing and able to speak out in support of girls education                                                                                                                                                                                  | 1                        | 2                     | 3                                              | 98                          |                              |                   |                   |
| F                        | I feel willing and able to speak out against child marriage                                                                                                                                                                                         | 1                        | 2                     | 3                                              | 98                          |                              |                   |                   |
| G                        | I feel willing and able to speak out against eve teasing                                                                                                                                                                                            | 1                        | 2                     | 3                                              | 98                          |                              |                   |                   |
| H                        | I feel able to seek help from others to achieve my goals                                                                                                                                                                                            | 1                        | 2                     | 3                                              | 98                          |                              |                   |                   |
| INCREASED SOCIAL NETWORK |                                                                                                                                                                                                                                                     |                          |                       |                                                |                             |                              |                   |                   |
| 603                      | Do you belong to any of the following groups? And how often do you attend? <b>READ EACH OPTION AND RECORD WHETHER BELONGS TO THE GROUP AND THEN FOR EACH GROUP RESPONDED AS "YES" ASK HOW OFTEN THEY MEET IN THE GROUP AND RECORD THE RESPONSE.</b> |                          |                       |                                                |                             |                              |                   |                   |
|                          | <b>TYPE OF GROUPS</b>                                                                                                                                                                                                                               | <b>BELONGS TO GROUP?</b> |                       | <b>HOW OFTEN DO YOU ATTEND?</b>                |                             |                              |                   |                   |
|                          |                                                                                                                                                                                                                                                     | <b>YES</b>               | <b>NO</b>             | <b>ALMOST EVERY DAY</b>                        | <b>AT LEAST ONCE A WEEK</b> | <b>AT LEAST ONCE A MONTH</b> | <b>LESS OFTEN</b> | <b>NOT AT ALL</b> |
|                          | A. PARIVARTAN GROUP                                                                                                                                                                                                                                 | 1                        | 0                     | 1                                              | 2                           | 3                            | 4                 | 5                 |
|                          | B. SPORTS GROUP                                                                                                                                                                                                                                     | 1                        | 0                     | 1                                              | 2                           | 3                            | 4                 | 5                 |
|                          | C. STUDY GROUP                                                                                                                                                                                                                                      | 1                        | 0                     | 1                                              | 2                           | 3                            | 4                 | 5                 |
|                          | D. LIFE SKILLS EDUCATION                                                                                                                                                                                                                            | 1                        | 0                     | 1                                              | 2                           | 3                            | 4                 | 5                 |
|                          | E. DANCING/SINGING/MUSIC GROUP                                                                                                                                                                                                                      | 1                        | 0                     | 1                                              | 2                           | 3                            | 4                 | 5                 |
|                          | F. SAVINGS GROUP                                                                                                                                                                                                                                    | 1                        | 0                     | 1                                              | 2                           | 3                            | 4                 | 5                 |
|                          | G. BHAJANA GROUP                                                                                                                                                                                                                                    | 1                        | 0                     | 1                                              | 2                           | 3                            | 4                 | 5                 |
|                          | H. KISHORI GROUP                                                                                                                                                                                                                                    | 1                        | 0                     | 1                                              | 2                           | 3                            | 4                 | 5                 |
| 604                      | Have you ever taken part in a public discussion, campaign or action against child marriage?                                                                                                                                                         |                          |                       | YES ..... 1<br>NO..... 0<br>DON'T KNOW..... 98 |                             |                              |                   |                   |
| 605                      | Have you ever taken part in a public discussion, campaign or action in support of girl's education?                                                                                                                                                 |                          |                       | YES ..... 1<br>NO..... 0<br>DON'T KNOW..... 98 |                             |                              |                   |                   |

| NO.                                                          | QUESTIONS                                                                                                                                                                                       | CODING CATEGORIES                                                                                                                                                                                                                                                  | SKIP  |
|--------------------------------------------------------------|-------------------------------------------------------------------------------------------------------------------------------------------------------------------------------------------------|--------------------------------------------------------------------------------------------------------------------------------------------------------------------------------------------------------------------------------------------------------------------|-------|
| 606                                                          | How many close friends do you have?<br><br><b>CLOSE FRIEND</b> MEANS SOMEONE YOU FEEL YOU COULD TALK TO IN CONFIDENCE IF SOMETHING WAS TROUBLING YOU AND YOU HOLD A LOT OF TRUST IN THAT PERSON | NUMBER OF CLOSE FRIENDS <input type="text"/> <input type="text"/><br><br>(RECORD '00' IF NO CLOSE FRIENDS)                                                                                                                                                         |       |
| 607                                                          | Did you make new friends in the last year?                                                                                                                                                      | YES ..... 1<br>NO..... 0<br>DON'T KNOW..... 98                                                                                                                                                                                                                     |       |
| 608                                                          | The last time you needed help or advice, did any of your friends help you?                                                                                                                      | YES ..... 1<br>NO..... 0<br>DID NOT NEED ANY HELP..... 94<br>DON'T KNOW..... 98                                                                                                                                                                                    |       |
| 609                                                          | If something was troubling you (e.g. academic performance, your own health issues, harassment etc), is there someone in your family you feel you could talk to about this?                      | YES ..... 1<br>NO..... 0<br>DON'T KNOW..... 98                                                                                                                                                                                                                     | } 611 |
| 610                                                          | Which family member(s) do you feel most comfortable talking to?                                                                                                                                 | NO ONE ..... 0<br>MOTHER ..... 1<br>FATHER ..... 2<br>SISTER ..... 3<br>BROTHER ..... 4<br>GRAND PARENTS ..... 5<br>OTHERS (SPECIFY)..... 96                                                                                                                       |       |
| 611                                                          | If something were troubling you about school, who would you go to first for advice and support?                                                                                                 | NO ONE (I'D KEEP IT TO MYSELF)..... 0<br>FRIEND ..... 1<br>PARENT ..... 2<br>SIBLING ..... 3<br>OTHER RELATIVE ..... 4<br>TEACHER ..... 5<br>OTHER TRUSTED ADULT ..... 6<br>PROJECT OUTREACH WORKER ..... 7<br>PARIVARTAN GROUP ..... 8<br>OTHER (SPECIFY)..... 96 |       |
| 612                                                          | If you experienced conflict with your parents, who if anyone, would you go to for advice and support?                                                                                           | NO ONE (I'D KEEP IT TO MYSELF)..... 0<br>FRIEND ..... 1<br>SIBLING ..... 2<br>OTHER RELATIVE ..... 3<br>TEACHER ..... 4<br>OTHER TRUSTED ADULT ..... 5<br>PROJECT OUTREACH WORKER ..... 6<br>PARIVARTAN GROUP ..... 7<br>OTHER (SPECIFY)..... 96                   |       |
| <b>MARRIAGE DISCUSSION AND FEELINGS ABOUT THE DISCUSSION</b> |                                                                                                                                                                                                 |                                                                                                                                                                                                                                                                    |       |
| 613                                                          | Have you ever heard your parents discussing your marriage in the last 12 months?                                                                                                                | YES ..... 1<br>NO..... 0<br>NOT APPLICABLE..... 97<br>DON'T KNOW..... 98                                                                                                                                                                                           | } 701 |

|            |                                                                                                                          |                                                                                                                                                                                                                                                                                                                               |             |
|------------|--------------------------------------------------------------------------------------------------------------------------|-------------------------------------------------------------------------------------------------------------------------------------------------------------------------------------------------------------------------------------------------------------------------------------------------------------------------------|-------------|
|            |                                                                                                                          | NO ANSWER..... 99                                                                                                                                                                                                                                                                                                             |             |
| <b>NO.</b> | <b>QUESTIONS</b>                                                                                                         | <b>CODING CATEGORIES</b>                                                                                                                                                                                                                                                                                                      | <b>SKIP</b> |
| 614        | When your parents discussed about your marriage in the past 12 months, did they discuss this with you?                   | YES ..... 1<br>NO..... 0<br>DON'T KNOW..... 98                                                                                                                                                                                                                                                                                |             |
| 615        | How did you feel when you heard your parents discussing your marriage?<br><br>(DO NOT READ THE RESPONSE, PROBE FOR MORE) | HAPPY..... A<br>EXCITED ..... B<br>ANXIOUS ..... C<br>STRESSED ..... D<br>INTERNAL PAIN ..... E<br>ANGRY ..... F<br>DEPRESSED ..... G<br>SAD ..... H<br>CONFUSED ..... I<br>FRUSTRATED ..... J<br>EMBARRASSED ..... K<br>SURPRISED ..... L<br>SHOCKED ..... M<br>SHY ..... N<br>OTHER (SPECIFY) ..... X<br>DON'T KNOW ..... Y |             |

| <b>BLOCK VII: AWARENESS OF GOVERNMENT SHEMES AND SUBSIDIES TO ENCOURAGE EDUCATION AND INVOLVMENT IN OTHER PROGRAM ACTIVITIES</b> |                                                                                                                                                                                                                                                                                  |                                                    |     |                |                                              |              |              |                         |  |
|----------------------------------------------------------------------------------------------------------------------------------|----------------------------------------------------------------------------------------------------------------------------------------------------------------------------------------------------------------------------------------------------------------------------------|----------------------------------------------------|-----|----------------|----------------------------------------------|--------------|--------------|-------------------------|--|
| 701                                                                                                                              | As you may be aware, the government has different kinds of programmes and schemes to help girls from poor families to attend school. I'm going to read out a list of programmes and I want you tell me if you or your family are currently benefiting from any of these schemes? |                                                    |     |                |                                              |              |              |                         |  |
| Sl. no.                                                                                                                          | Schemes/subsidies                                                                                                                                                                                                                                                                | Are you currently participating in this programme? |     |                | Why are you not participating in the scheme? |              |              |                         |  |
|                                                                                                                                  |                                                                                                                                                                                                                                                                                  | YES                                                | NO  | NOT APPLICABLE | NOT AWARE OF THE SCHEME                      | NOT ELIGIBLE | NOT REQUIRED | APPLIED BUT DID NOT GET |  |
| (1)                                                                                                                              | (2)                                                                                                                                                                                                                                                                              | (3)                                                | (4) | (5)            | (6)                                          | (7)          | (8)          | (9)                     |  |
| A                                                                                                                                | Pre Metric Hostels                                                                                                                                                                                                                                                               | 1                                                  | 0   | 97             | 1                                            | 2            | 3            | 4                       |  |
| B                                                                                                                                | Post Metric Hostels                                                                                                                                                                                                                                                              | 1                                                  | 0   | 97             | 1                                            | 2            | 3            | 4                       |  |
| C                                                                                                                                | Incentive scholarships                                                                                                                                                                                                                                                           | 1                                                  | 0   | 97             | 1                                            | 2            | 3            | 4                       |  |
| D                                                                                                                                | Scholarship for high school going girls                                                                                                                                                                                                                                          | 1                                                  | 0   | 97             | 1                                            | 2            | 3            | 4                       |  |
| E                                                                                                                                | Pre metric scholarships                                                                                                                                                                                                                                                          | 1                                                  | 0   | 97             | 1                                            | 2            | 3            | 4                       |  |
| F                                                                                                                                | Pre metric scholarship for the children of parents who are in unclean occupation i.e. Scavenging, Tanning and Flayin                                                                                                                                                             | 1                                                  | 0   | 97             | 1                                            | 2            | 3            | 4                       |  |
| G                                                                                                                                | State Post metric scholarships                                                                                                                                                                                                                                                   | 1                                                  | 0   | 97             | 1                                            | 2            | 3            | 4                       |  |
| H                                                                                                                                | Prize money for meritorious students                                                                                                                                                                                                                                             | 1                                                  | 0   | 97             | 1                                            | 2            | 3            | 4                       |  |
| I                                                                                                                                | Book Bank Scheme                                                                                                                                                                                                                                                                 | 1                                                  | 0   | 97             | 1                                            | 2            | 3            | 4                       |  |
| J                                                                                                                                | Kishori Shakthi Yojana                                                                                                                                                                                                                                                           | 1                                                  | 0   | 97             | 1                                            | 2            | 3            | 4                       |  |
| K                                                                                                                                | Rajiv Gandhi scheme for empowerment of Adolescent girls - SABALA                                                                                                                                                                                                                 | 1                                                  | 0   | 97             | 1                                            | 2            | 3            | 4                       |  |
| L                                                                                                                                | Akshara Dasoha - Miday Meal program                                                                                                                                                                                                                                              | 1                                                  | 0   | 97             | 1                                            | 2            | 3            | 4                       |  |
| M                                                                                                                                | Free Text Books & Note Books                                                                                                                                                                                                                                                     | 1                                                  | 0   | 97             | 1                                            | 2            | 3            | 4                       |  |
| N                                                                                                                                | Free school uniforms                                                                                                                                                                                                                                                             | 1                                                  | 0   | 97             | 1                                            | 2            | 3            | 4                       |  |
| O                                                                                                                                | Free bi-cycle                                                                                                                                                                                                                                                                    | 1                                                  | 0   | 97             | 1                                            | 2            | 3            | 4                       |  |
| X                                                                                                                                | Any others (specify)                                                                                                                                                                                                                                                             | 1                                                  | 0   | 97             | 1                                            | 2            | 3            | 4                       |  |

| NO. | QUESTIONS                                                                                                                        | CODING CATEGORIES                                                                                                                                                                                                      |           |                            |           |                                             |                     |                    |                                   |                  |  | SKIP  |
|-----|----------------------------------------------------------------------------------------------------------------------------------|------------------------------------------------------------------------------------------------------------------------------------------------------------------------------------------------------------------------|-----------|----------------------------|-----------|---------------------------------------------|---------------------|--------------------|-----------------------------------|------------------|--|-------|
| 702 | Are you currently attending any tutorial classes?                                                                                | YES..... 1<br>NO ..... 0                                                                                                                                                                                               |           |                            |           |                                             |                     |                    |                                   |                  |  | → 704 |
| 703 | Who sponsors the tutorial classes you attend?                                                                                    | SCHOOL ..... 1<br>PRIVATE ..... 2<br>PROJECT/NGO ..... 3<br>OTHER (SPECIFY) ..... 96                                                                                                                                   |           |                            |           |                                             |                     |                    |                                   |                  |  | } 705 |
| 704 | What is the primary reason you are not attending any tutorial classes?                                                           | NOT REQUIRED FOR ME ..... 1<br>DO NOT HAVE TIME ..... 2<br>COSTS TOO MUCH ..... 3<br>PARENTS/GUARDIANS DENIED.....<br>SCHOOL DID NOT ALLOW ..... 5<br>OTHER (SPECIFY) ..... 96<br>NOT APPLICABLE/NOT ELIGIBLE ..... 97 |           |                            |           |                                             |                     |                    |                                   |                  |  |       |
| 705 | Have you ever attended Parivartan Group Sessions?                                                                                | YES..... 1<br>NO ..... 0<br>DON'T KNOW ..... 98                                                                                                                                                                        |           |                            |           |                                             |                     |                    |                                   |                  |  | } 707 |
| 706 | Did you complete the entire Parivatan Programme?                                                                                 | YES..... 1<br>NO ..... 0                                                                                                                                                                                               |           |                            |           |                                             |                     |                    |                                   |                  |  |       |
| 707 | Have you ever attended any of the following services/trainings in your school? If not, what is the reason for not participating? |                                                                                                                                                                                                                        |           |                            |           |                                             |                     |                    |                                   |                  |  |       |
|     | <b>SERVICES/TRAININGS</b>                                                                                                        | <b>EVER AVAILED ?</b>                                                                                                                                                                                                  |           | <b>CURRENTLY AVAILING?</b> |           | <b>WHAT IS THE REASON FOR NOT AVAILING?</b> |                     |                    |                                   |                  |  |       |
|     |                                                                                                                                  | <b>YES</b>                                                                                                                                                                                                             | <b>NO</b> | <b>YES</b>                 | <b>NO</b> | <b>NOT ELIGIBLE</b>                         | <b>NOT REQUIRED</b> | <b>DID NOT GET</b> | <b>NOT AVAILABLE AT MY SCHOOL</b> | <b>NO ANSWER</b> |  |       |
| A   | CAREER COUNSELLING                                                                                                               | 1                                                                                                                                                                                                                      | 0         | 1                          | 0         | 1                                           | 2                   | 3                  | 95                                | 99               |  |       |
| B   | LIVELIHOOD/VOCATIONAL TRAINING                                                                                                   | 1                                                                                                                                                                                                                      | 0         | 1                          | 0         | 1                                           | 2                   | 3                  | 95                                | 99               |  |       |
| C   | LIFE SKILL TRAINING                                                                                                              | 1                                                                                                                                                                                                                      | 0         | 1                          | 0         | 1                                           | 2                   | 3                  | 95                                | 99               |  |       |
| D   | Leadership training                                                                                                              | 1                                                                                                                                                                                                                      | 0         | 1                          | 0         | 1                                           | 2                   | 3                  | 95                                | 99               |  |       |

| <b>BLOCK VIII: KNOWLEDGE OF HIV AND AIDS, EVE TEASING AND MENTAL HEALTH</b> |                                                                 |                           |  |  |  |  |  |  |  |  |  |       |
|-----------------------------------------------------------------------------|-----------------------------------------------------------------|---------------------------|--|--|--|--|--|--|--|--|--|-------|
| Now I'd like to ask you a few questions HIV/ADIS.                           |                                                                 |                           |  |  |  |  |  |  |  |  |  |       |
| NO.                                                                         | QUESTIONS                                                       | CODING CATEGORIES         |  |  |  |  |  |  |  |  |  | SKIP  |
| 801                                                                         | Have you ever heard/read about HIV, the virus that causes AIDS? | YES ..... 1<br>NO ..... 0 |  |  |  |  |  |  |  |  |  | → 808 |
| 802                                                                         | Do you know how HIV is transmitted?                             | YES ..... 1<br>NO ..... 0 |  |  |  |  |  |  |  |  |  | → 804 |

| NO.                                                                                                  | QUESTIONS                                                                                                                                                                               | CODING CATEGORIES                                                                                                                                                                                                                                       | SKIP |
|------------------------------------------------------------------------------------------------------|-----------------------------------------------------------------------------------------------------------------------------------------------------------------------------------------|---------------------------------------------------------------------------------------------------------------------------------------------------------------------------------------------------------------------------------------------------------|------|
| 803                                                                                                  | Can you please tell me all the ways you know?<br><br><b>(Do not read out the list, but after each response, ask if there are any other ways)</b>                                        | HAVING SEX WITHOUT A CONDOM ..... A<br>UNSAFE BLOOD TRANSFUSION ..... B<br>UNSTERILE INJECTIONS ..... C<br>TRANSMITTED FROM MOTHER TO CHILD DURING PREGNANCY ..... D<br>SHARING PERSONAL ITEMS ..... E<br>OTHER (SPECIFY) ..... X<br>DON'T KNOW ..... Y |      |
| 804                                                                                                  | Is it possible for a healthy looking person to have HIV/AIDS?                                                                                                                           | YES ..... 1<br>NO ..... 0<br>DON'T KNOW ..... 98                                                                                                                                                                                                        |      |
| 805                                                                                                  | Can HIV be transmitted by mosquito bites?                                                                                                                                               | YES ..... 1<br>NO ..... 0<br>DON'T KNOW ..... 98                                                                                                                                                                                                        |      |
| 806                                                                                                  | Can HIV be transmitted by sharing cups and plates?                                                                                                                                      | YES ..... 1<br>NO ..... 0<br>DON'T KNOW ..... 98                                                                                                                                                                                                        |      |
| 807                                                                                                  | Can HIV be transmitted by kissing?                                                                                                                                                      | YES ..... 1<br>NO ..... 0<br>DON'T KNOW ..... 98                                                                                                                                                                                                        |      |
| <b>EVE TEASING</b>                                                                                   |                                                                                                                                                                                         |                                                                                                                                                                                                                                                         |      |
| <b>Sometimes as girls bodies mature, they begin to attract unwanted attention from boys and men.</b> |                                                                                                                                                                                         |                                                                                                                                                                                                                                                         |      |
| 808                                                                                                  | In the past month, have you heard about other girls in your village getting sexually harassed or teased somewhere in the village or on their way to school?                             | YES ..... 1<br>NO ..... 0<br>DON'T KNOW ..... 98<br>NO ANSWER ..... 99                                                                                                                                                                                  |      |
| 809                                                                                                  | Last time, when did you witness a girl being sexually harassed or teased somewhere in the village or on the way to school?                                                              | NEVER ..... 0<br>WITHIN THE LAST MONTH ..... 1<br>LONGER THAN A MONTH BUT WITHIN THE LAST YEAR ..... 2<br>LONGER THAN A YEAR ..... 3                                                                                                                    | 812  |
| 810                                                                                                  | What was the age of the person(s) who you witnessed sexually harassing or teasing other girls somewhere in the village or on their way to school last time? Under 18, over 18, or both? | AGED UNDER 18 YEARS ..... 1<br>AGED OVER 18 YEARS ..... 2<br>BOTH ..... 3                                                                                                                                                                               |      |
| 811                                                                                                  | Who were the people who you witnessed sexually harassing or teasing other girls somewhere in the village or on their way to school last time?                                           | SC/ST BOYS/MEN ..... 1<br>NON SC/ST BOYS/MEN ..... 2<br>BOTH ..... 3<br>DON'T KNOW ..... 98                                                                                                                                                             |      |
| 812                                                                                                  | In the past month, have you heard about girls being sexually harassed, groped or teased by someone at school?                                                                           | YES ..... 1<br>NO ..... 0<br>DON'T KNOW ..... 98<br>NO ANSWER ..... 99                                                                                                                                                                                  |      |
| 813                                                                                                  | When did you last time actually witness a girl being sexually harassed, groped or teased by someone at school?                                                                          | NEVER ..... 0<br>WITHIN THE LAST MONTH ..... 1<br>LONGER THAN A MONTH BUT WITHIN THE LAST YEAR ..... 2                                                                                                                                                  | 815  |

|                                                                                                                                                                                                                               |                                                                                                                                                                                                                      |                                                                                                                                                                    |             |
|-------------------------------------------------------------------------------------------------------------------------------------------------------------------------------------------------------------------------------|----------------------------------------------------------------------------------------------------------------------------------------------------------------------------------------------------------------------|--------------------------------------------------------------------------------------------------------------------------------------------------------------------|-------------|
|                                                                                                                                                                                                                               |                                                                                                                                                                                                                      | ..... 2<br>LONGER THAN A YEAR ..... 3                                                                                                                              |             |
| <b>NO.</b>                                                                                                                                                                                                                    | <b>QUESTIONS</b>                                                                                                                                                                                                     | <b>CODING CATEGORIES</b>                                                                                                                                           | <b>SKIP</b> |
| 814                                                                                                                                                                                                                           | Who were the people who you actually witnessed sexually harassing, groping or teasing girls at school last time?<br><br>Was this done by another student, a young person not in school, a teacher, or another adult? | ANOTHER STUDENT ..... 1<br>YOUNG PERSON NOT IN SCHOOL ..... 2<br>TEACHER ..... 3<br>ANOTHER ADULT ..... 4<br>DON'T KNOW ..... 98                                   |             |
| <b>MENTAL HEALTH</b>                                                                                                                                                                                                          |                                                                                                                                                                                                                      |                                                                                                                                                                    |             |
| <b>Emotional health or emotional well-being affects us all and we all have times when we feel down or stressed or frightened. Over the last two weeks, how often have you been bothered by any of the following problems?</b> |                                                                                                                                                                                                                      |                                                                                                                                                                    |             |
| 815                                                                                                                                                                                                                           | Feeling down, depressed, or hopeless?                                                                                                                                                                                | NOT AT ALL (0 DAYS) ..... 0<br>SEVERAL DAYS(1 TO 7 DAYS) ..... 1<br>MORE THAN HALF THE DAYS(MORE THAN 7 DAYS) . 2<br>NEARLY EVERY DAY(PAST TWO WEEKS OR 14 DAYS) 3 |             |
| 816                                                                                                                                                                                                                           | Trouble falling or staying asleep, or sleeping too much?                                                                                                                                                             | NOT AT ALL (0 DAYS) ..... 0<br>SEVERAL DAYS(1 TO 7 DAYS) ..... 1<br>MORE THAN HALF THE DAYS(MORE THAN 7 DAYS) . 2<br>NEARLY EVERY DAY(PAST TWO WEEKS OR 14 DAYS) 3 |             |
| 817                                                                                                                                                                                                                           | Feeling tired or having little energy?                                                                                                                                                                               | NOT AT ALL (0 DAYS) ..... 0<br>SEVERAL DAYS(1 TO 7 DAYS) ..... 1<br>MORE THAN HALF THE DAYS(MORE THAN 7 DAYS) . 2<br>NEARLY EVERY DAY(PAST TWO WEEKS OR 14 DAYS) 3 |             |
| 818                                                                                                                                                                                                                           | Feeling bad about your self?                                                                                                                                                                                         | NOT AT ALL (0 DAYS) ..... 0<br>SEVERAL DAYS(1 TO 7 DAYS) ..... 1<br>MORE THAN HALF THE DAYS(MORE THAN 7 DAYS) . 2<br>NEARLY EVERY DAY(PAST TWO WEEKS OR 14 DAYS) 3 |             |
| 819                                                                                                                                                                                                                           | Trouble concentrating on things, such as doing household chores, engaging in conversations or playing?                                                                                                               | NOT AT ALL (0 DAYS) ..... 0<br>SEVERAL DAYS(1 TO 7 DAYS) ..... 1<br>MORE THAN HALF THE DAYS(MORE THAN 7 DAYS) . 2<br>NEARLY EVERY DAY(PAST TWO WEEKS OR 14 DAYS) 3 |             |

**GO TO BLOCK - IX**

**BLANK PAGE FOR ANY OTHER INFORMATION**



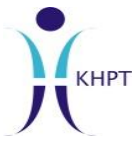

CONFIDENTIAL: FOR RESEARCH  
PURPOSE ONLY

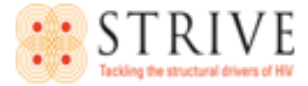

Study Number:

|  |  |  |  |
|--|--|--|--|
|  |  |  |  |
|--|--|--|--|

**NEW SECTION TO BE COMPLETED ANONYMOUSLY USING PEN AND PAPER**

**BLOCK IX: SEXUAL BEHAVIOUR AND PREGNANCY**

The next section of the interview deals with romantic behaviours, sexual behaviours, pregnancy and childbearing. For some people, these topics are private matters and can be embarrassing to discuss. Therefore we have created a short paper survey that you can fill out in complete privacy. I will never know what answers you give. When you are finished, I will ask you to seal you answers in an envelope and add them to this bag with lots of other people's answers. If you have any questions, however, I will be more than happy to answer them. Tick (✓) the correct answer wherever the box is given.

| NO.                                               | QUESTIONS                                                                                                                                                                          | CODING CATEGORIES                                                                                                                                                                                                                                                                                   |  |
|---------------------------------------------------|------------------------------------------------------------------------------------------------------------------------------------------------------------------------------------|-----------------------------------------------------------------------------------------------------------------------------------------------------------------------------------------------------------------------------------------------------------------------------------------------------|--|
| 901                                               | As girls grow into women, certain changes happen to their bodies. One of these changes is that they start to have menstrual periods. Have you had your first menstrual period yet? | 1.YES ..... <input type="checkbox"/><br>2.NO ..... <input type="checkbox"/>                                                                                                                                                                                                                         |  |
| 902                                               | How old were you when you first started menstruating                                                                                                                               | AGE IN COMPLETED YEARS ..... <input type="text"/> <input type="text"/><br>DON'T KNOW ..... 98                                                                                                                                                                                                       |  |
| 903                                               | Sometimes as girl's bodies mature, they begin to attract unwanted attention from boys and men. In the past 12 months, have you been sexually harassed or teased?                   | 1.YES ..... <input type="checkbox"/><br>2.NO ..... <input type="checkbox"/>                                                                                                                                                                                                                         |  |
| 904                                               | How often have you been teased in the last 12 months?<br><br>(TICK ONLY ONE RESPONSE)                                                                                              | 1. ONCE OR TWICE IN 12 MONTHS ..... <input type="checkbox"/><br>2. LESS THAN ONCE A MONTH ..... <input type="checkbox"/><br>3. MORE THAN ONCE A MONTH ..... <input type="checkbox"/><br>4. AT LEAST EVERY WEEK ..... <input type="checkbox"/><br>5. ALMOST EVERY DAY ..... <input type="checkbox"/> |  |
| <b>Thinking now about the last 3 months only:</b> |                                                                                                                                                                                    |                                                                                                                                                                                                                                                                                                     |  |
| 905                                               | Have you been sexually teased or harassed at school in the last 3 months?                                                                                                          | 1.YES ..... <input type="checkbox"/><br>2.NO ..... <input type="checkbox"/>                                                                                                                                                                                                                         |  |
| 906                                               | Have you been sexually teased or harassed in the last 3 months on your way to school?                                                                                              | 1.YES ..... <input type="checkbox"/><br>2.NO ..... <input type="checkbox"/>                                                                                                                                                                                                                         |  |

| NO. | QUESTIONS                                                                                                                                    | CODING CATEGORIES                                                                                                                                                                                                                                                                                                                                                                                                                                                                                                    |  |
|-----|----------------------------------------------------------------------------------------------------------------------------------------------|----------------------------------------------------------------------------------------------------------------------------------------------------------------------------------------------------------------------------------------------------------------------------------------------------------------------------------------------------------------------------------------------------------------------------------------------------------------------------------------------------------------------|--|
| 907 | Have you been sexually teased or harassed in the last 3 months somewhere else in the village?                                                | 1.YES ..... <input type="checkbox"/><br>2.NO ..... <input type="checkbox"/>                                                                                                                                                                                                                                                                                                                                                                                                                                          |  |
| 908 | Are you currently married?                                                                                                                   | 1.YES ..... <input type="checkbox"/><br>2.NO ..... <input type="checkbox"/>                                                                                                                                                                                                                                                                                                                                                                                                                                          |  |
| 909 | Have you ever had a boyfriend/lover?                                                                                                         | 1.YES ..... <input type="checkbox"/><br>2.NO ..... <input type="checkbox"/>                                                                                                                                                                                                                                                                                                                                                                                                                                          |  |
| 910 | Have you ever had sexual intercourse? By sexual intercourse, I mean a man putting his penis into a woman's vagina.                           | 1.YES ..... <input type="checkbox"/><br>2.NO ..... <input type="checkbox"/>                                                                                                                                                                                                                                                                                                                                                                                                                                          |  |
| 911 | How old were you when you first had sexual intercourse?                                                                                      | AGE IN COMPLETED YEARS ..... <input type="text"/> <input type="text"/><br>DON'T KNOW ..... 98<br>NO ANSWER ..... 99                                                                                                                                                                                                                                                                                                                                                                                                  |  |
| 912 | Why did you have sex this first time?<br>(TICK ONLY ONE RESPONSE)                                                                            | 1. I GOT MARRIED ..... <input type="checkbox"/><br>2. I WAS DEDICATED AS DEVEDASI ..... <input type="checkbox"/><br>3. I WANTED TO HAVE SEX ..... <input type="checkbox"/><br>4. I WAS TRICKED INTO HAVING SEX ..... <input type="checkbox"/><br>5. I HAD SEX BECAUSE I NEEDED MONEY ... <input type="checkbox"/><br>6. I WAS PRESSURED INTO HAVE SEX ..... <input type="checkbox"/><br>7. I WAS PHYSICALLY FORCED TO HAVE SEX <input type="checkbox"/><br>8. OTHERS (PLEASE SPECIFY) _____ <input type="checkbox"/> |  |
| 913 | Since your first sex, have you ever had intercourse in exchange for food, school fees, gifts or other items?<br><br>(TICK ONLY ONE RESPONSE) | 1. NEVER ..... <input type="checkbox"/><br>2. ONCE ..... <input type="checkbox"/><br>3. A FEW TIMES ..... <input type="checkbox"/><br>4. MANY TIMES ..... <input type="checkbox"/>                                                                                                                                                                                                                                                                                                                                   |  |

| NO.                                                                     | QUESTIONS                                                                                                                                                                                                      | CODING CATEGORIES                                                                                                                                                                                     |  |
|-------------------------------------------------------------------------|----------------------------------------------------------------------------------------------------------------------------------------------------------------------------------------------------------------|-------------------------------------------------------------------------------------------------------------------------------------------------------------------------------------------------------|--|
| 914                                                                     | <p>Would you have chosen to have sex with this person if you knew before hand that you would not receive food, gifts or other items in return?</p> <p>(TICK ONLY ONE RESPONSE)</p>                             | <p>1. NEVER ..... <input type="checkbox"/></p> <p>2. ONCE ..... <input type="checkbox"/></p> <p>3. A FEW TIMES ..... <input type="checkbox"/></p> <p>4. MANY TIMES ..... <input type="checkbox"/></p> |  |
| 915                                                                     | <p>Have you ever engaged in sex work or explicitly negotiated money in exchange for sex.</p> <p>(TICK ONLY ONE RESPONSE)</p>                                                                                   | <p>1. NEVER ..... <input type="checkbox"/></p> <p>2. ONCE ..... <input type="checkbox"/></p> <p>3. A FEW TIMES ..... <input type="checkbox"/></p> <p>4. MANY TIMES ..... <input type="checkbox"/></p> |  |
| 916                                                                     | <p>Before the age of 15, did someone ever touch or fondle you in a sexual way when you did not want them to, but they did not try to force you to have sexual intercourse?</p> <p>(TICK ONLY ONE RESPONSE)</p> | <p>1. NEVER ..... <input type="checkbox"/></p> <p>2. ONCE ..... <input type="checkbox"/></p> <p>3. A FEW TIMES ..... <input type="checkbox"/></p> <p>4. MANY TIMES ..... <input type="checkbox"/></p> |  |
| 917                                                                     | <p>Before you were 15, did someone ever try to have sexual intercourse with you when you did not want to, but sex did not happen?</p> <p>(TICK ONLY ONE RESPONSE)</p>                                          | <p>1. NEVER ..... <input type="checkbox"/></p> <p>2. ONCE ..... <input type="checkbox"/></p> <p>3. A FEW TIMES ..... <input type="checkbox"/></p> <p>4. MANY TIMES ..... <input type="checkbox"/></p> |  |
| 918                                                                     | <p>Before you were 15, did someone ever force you to have sexual intercourse with them?</p> <p>(TICK ONLY ONE RESPONSE)</p>                                                                                    | <p>1. NEVER ..... <input type="checkbox"/></p> <p>2. ONCE ..... <input type="checkbox"/></p> <p>3. A FEW TIMES ..... <input type="checkbox"/></p> <p>4. MANY TIMES ..... <input type="checkbox"/></p> |  |
| <b>Now I would like to ask you about certain common health matters.</b> |                                                                                                                                                                                                                |                                                                                                                                                                                                       |  |
| 919                                                                     | <p>Have you ever been pregnant?</p>                                                                                                                                                                            | <p>1. YES ..... <input type="checkbox"/></p> <p>2. NO ..... <input type="checkbox"/></p>                                                                                                              |  |
| 920                                                                     | <p>How old were you when you first got pregnant?</p>                                                                                                                                                           | <p>WRITE AGE IN YEARS ..... <input type="text"/> <input type="text"/></p>                                                                                                                             |  |

| NO. | QUESTIONS                                                                                                                                    | CODING CATEGORIES                                                                                                                                                                                                                                                                                  |  |
|-----|----------------------------------------------------------------------------------------------------------------------------------------------|----------------------------------------------------------------------------------------------------------------------------------------------------------------------------------------------------------------------------------------------------------------------------------------------------|--|
| 921 | What was the outcome of your first pregnancy?                                                                                                | 1. BABY BORN ALIVE ..... <input type="checkbox"/><br>2. BABY STILL BORN (BORN DEAD AT THE END OF THE PREGNANCY ..... <input type="checkbox"/><br>3. MISCARRIAGE (PREGNANCY LOST BEFORE BABY WAS BORN) ..... <input type="checkbox"/><br>4. INDUCED LOSS OR ABORTION ..... <input type="checkbox"/> |  |
| 922 | How many times in your life have you been pregnant?                                                                                          | NUMBER OF TIMES ..... <input type="text"/>                                                                                                                                                                                                                                                         |  |
| 923 | Over the last two weeks, how often have you been bothered by thoughts that you would be better off dead, or of hurting yourself in some way? | 1. NOT AT ALL (0 DAYS) ..... <input type="checkbox"/><br>2. SEVERAL DAYS (1 TO 7 DAYS) ..... <input type="checkbox"/><br>3. MORE THAN HALF THE DAYS (MORE THAN 7 DAYS) ..... <input type="checkbox"/><br>4. NEARLY EVERY DAY (PAST TWO WEEKS OR 14 DAYS) ..... <input type="checkbox"/>            |  |

**THANK YOU**
